# Supplementary material for: Preferences for centralised emergency medical services: discrete choice experiment
Source: PubMed Central journal article supplement — BMJ Open. 2019 Nov 5;9(11):e030966. doi: 10.1136/bmjopen-2019-030966 (PMC6858184; doi:10.1136/bmjopen-2019-030966), 2019-11-05
Supplement: bmjopen-2019-030966.draft_revisions.pdf [file bmjopen-2019-030966.draft_revisions.pdf]

# BMJ Open

BMJ Open is committed to open peer review. As part of this commitment we make the peer review history of every article we publish publicly available.

When an article is published we post the peer reviewers' comments and the authors' responses online. We also post the versions of the paper that were used during peer review. These are the versions that the peer review comments apply to.

The versions of the paper that follow are the versions that were submitted during the peer review process. They are not the versions of record or the final published versions. They should not be cited or distributed as the published version of this manuscript.

BMJ Open is an open access journal and the full, final, typeset and author-corrected version of record of the manuscript is available on our site with no access controls, subscription charges or pay-per-view fees (<http://bmjopen.bmj.com>).

If you have any questions on BMJ Open's open peer review process please email [info.bmjopen@bmj.com](mailto:info.bmjopen@bmj.com)

# BMJ Open

## Preferences for centralised emergency medical services: a discrete choice experiment

|                               |                                                                                                                                                                                                                                                                                                                     |
|-------------------------------|---------------------------------------------------------------------------------------------------------------------------------------------------------------------------------------------------------------------------------------------------------------------------------------------------------------------|
| Journal:                      | <i>BMJ Open</i>                                                                                                                                                                                                                                                                                                     |
| Manuscript ID                 | bmjopen-2019-030966                                                                                                                                                                                                                                                                                                 |
| Article Type:                 | Research                                                                                                                                                                                                                                                                                                            |
| Date Submitted by the Author: | 10-Apr-2019                                                                                                                                                                                                                                                                                                         |
| Complete List of Authors:     | Bhattarai, Nawaraj; Newcastle University, Institute of Health & Society<br>Mcmeekin, Peter; University of Northumbria at Newcastle, Faculty of Health and Life Sciences<br>Price, Christopher I; Newcastle University, Institute of Neuroscience<br>Vale, Luke; Newcastle University, Institute of Health & Society |
| Keywords:                     | ACCIDENT & EMERGENCY MEDICINE, HEALTH ECONOMICS, Organisation of health services < HEALTH SERVICES ADMINISTRATION & MANAGEMENT                                                                                                                                                                                      |
|                               |                                                                                                                                                                                                                                                                                                                     |

SCHOLARONE™  
Manuscripts

1  
2 **Title:** Preferences for centralised emergency medical services: a discrete choice experiment  
3  
4

5 **Authors:** Nawaraj Bhattarai<sup>1</sup>, Peter McMeekin<sup>2</sup>, Christopher Price<sup>3</sup>, Luke Vale<sup>1</sup>  
6

- 7 1. Institute of Health & Society, Newcastle University, Newcastle upon Tyne,  
8 United Kingdom  
9  
10 2. Faculty of Health and Life Sciences, University of Northumbria in Newcastle,  
11 Newcastle upon Tyne, United Kingdom  
12  
13 3. Institute of Neuroscience, Newcastle University, Newcastle upon Tyne, United  
14 Kingdom  
15  
16

17  
18 **Corresponding Author:**

19 Nawaraj Bhattarai

20 E-mail: [nawaraj.bhattarai@ncl.ac.uk](mailto:nawaraj.bhattarai@ncl.ac.uk)  
21

22 Phone: 01912087821  
23

24  
25  
26 Institute of Health and Society

27 Newcastle University

28 Baddiley-Clark Building

29 Richardson Road

30 Newcastle upon Tyne

31 NE2 4AX, United Kingdom  
32  
33  
34  
35  
36  
37  
38

39 **Key words:** preferences, discrete choice experiment, centralisation, emergency medical services  
40  
41

42 **Word count:** 3931 words  
43  
44  
45  
46  
47  
48  
49  
50  
51  
52  
53  
54  
55  
56  
57  
58  
59  
60

## ABSTRACT

### Objectives

It is desirable that public preferences are established and incorporated in emergency healthcare reforms. The aim of this study was to investigate preferences for local versus centralised provision of all emergency medical services (EMS) and explore what individuals think are important considerations for EMS delivery.

### Design

A discrete choice experiment was conducted. The attributes used in the choice scenarios were: travel time to the hospital, waiting time to be seen, length of stay in the hospital, risks of dying, readmission, and opportunity for outpatient care after emergency treatment at a local hospital.

### Setting

North East England

### Participants

Participants were a randomly sampled general population, aged 18 years or above.

### Primary and Secondary Outcome measures

Analysis used logistic regression modelling techniques to determine the preference of each attribute. Marginal rates of substitution between attributes were estimated to understand the trade-offs individuals were willing to make.

### Results

Responses were obtained from 148 people (62 completed a web and 86 a postal version). Respondents preferred shorter travel time to hospital, shorter waiting time, fewer number of days in

1 hospital, low risk of death, low risk of readmission and outpatient-follow up care in their local hospital.  
2  
3  
4 However, individuals were willing to trade-off increased travel time and waiting time for high quality  
5  
6 centralised care. Individuals were willing to travel nine minutes more for a one day reduction in length  
7  
8 of stay in the hospital, 38 minutes for a 1% reduction in risk of death and 112 minutes for having  
9  
10 outpatient follow-up care at their local hospital.  
11  
12  
13  
14

## 15 **Conclusions**

16 People value centralised EMS if it provides higher quality care and are willing to travel further and  
17  
18 wait longer.  
19  
20  
21  
22  
23

## 24 **Strengths and limitations of this study**

- 25  
26 • The findings of this study might inform decision makers redesigning emergency medical  
27  
28 services about preferences of potential users of that service.  
29
- 30  
31 • Participants were randomly sampled from specific population groups registered with  
32  
33 Healthwatch or Northumbria Healthcare NHS Foundation Trust, and therefore may not  
34  
35 represent the general population.  
36
- 37  
38 • The attributes used in the DCE and their levels were framed to closely represent emergency  
39  
40 care in NHS England, however some other important attributes may have been left out.  
41  
42  
43  
44  
45  
46  
47  
48  
49  
50  
51  
52  
53  
54  
55  
56  
57  
58  
59  
60

## BACKGROUND

The National Health Services (NHS) in the United Kingdom (UK) faces growing service demands, clinical care standards and costs which threaten its sustainability and financial stability.[1] A radical and transformative change is essential for the NHS to maintain safety and quality, but this may reduce immediate access to care for some patients. While all areas of healthcare face challenges and major changes in service provision, those faced by acute hospitals are significant because outcomes can depend upon time-critical treatments, demand is rising annually and they are supported by a major proportion of the healthcare budget.[2]

In the UK, consolidation of specialised medical care is one of the service models envisaged by the NHS "Five year forward view".[3] It is recommended that emergency care be reconfigured into larger specialised emergency units providing earlier multidisciplinary expertise and associated facilities.[4] Whilst there exists some condition specific evidence that centralisation of specialist services yields better clinical outcomes and savings,[5-7] there are arguments against centralisation in term of poorer access, increased travel time and costs, as well as preferences expressed by patients and the public around the provision of local services.[8-12]

Understanding public preferences about the location and nature of healthcare providers has become an important influence upon policy and many European countries have incorporated this information into decisions about the organisation of their healthcare systems.[13] Incorporating patient views in healthcare policy decisions may improve the uptake and efficiency of services. However, little is known about preferences for the centralisation of emergency medical services.

1  
2 The aim of this study was to examine public preferences for the different attributes of centralised  
3  
4 emergency medical services in England, reported using trade-offs between attributes which reflect  
5  
6 the key consequences.  
7  
8  
9  
10

## 11 **METHODS**

12  
13  
14 A discrete choice experiment (DCE) was used to explore preferences. DCEs provide rich data  
15  
16 sources for economic evaluation and decision-making and offer several other advantages compared  
17  
18 to other stated preference elicitation methods.[14,15] DCEs involve presenting individuals with a  
19  
20 series of hypothetical choices which differ in attributes (characteristics) and their magnitude or levels,  
21  
22 and ask them to choose the alternative they prefer in each set. The choices that individuals make  
23  
24 from a DCE survey enable researchers to understand the value that individuals place on various  
25  
26 levels of healthcare provision attributes. A DCE also allows quantification of the relative importance  
27  
28 of attributes in terms of willingness to pay and marginal rates of substitution.[16]  
29  
30  
31  
32  
33  
34

### 35 **Attributes and level**

36  
37 The attributes associated with centralisation were identified from literature[17-21] and also reflected  
38  
39 the key performance measures commonly used in emergency medical services[22] and key quality  
40  
41 indicators in NHS England (Table 1).[10,23,24] The identified attributes were assigned levels that  
42  
43 were realistically applicable within the UK NHS.[25]  
44  
45  
46  
47  
48  
49  
50  
51  
52  
53  
54  
55  
56  
57  
58  
59  
60

**Table 1. Attributes and levels used in the DCE**

| Attributes                                                                                   | Levels                                                                                                                        |
|----------------------------------------------------------------------------------------------|-------------------------------------------------------------------------------------------------------------------------------|
| Travel time to hospital                                                                      | < 30 min, 1 hour, 1 and half hours, 2 hours or more                                                                           |
| Waiting time in the A&E department to be seen by a doctor or nurse who can provide treatment | 30 min, 1 hour, 2 and half hours, 4 hours or more                                                                             |
| Length of stay at the hospital before going home                                             | 1 day or less, 3 days, 5 days, 6 days or more                                                                                 |
| Risk of dying from the illness                                                               | Low (Less than 1 in 100 patients), Mild (3 in 100 patients), Moderate (5 in 100 patients), High (More than 7 in 100 patients) |
| Risk of being re-admitted to the hospital after going home                                   | Low (Less than 1 in 100 patients), Mild (3 in 100 patients), Moderate (5 in 100 patients), High (More than 7 in 100 patients) |
| Outpatient care after emergency treatment                                                    | At your Local hospital, At a hospital which is about an extra 1 hour travel time from your local hospital                     |

### Questionnaire design

A full factorial design incorporating all possible combinations of attributes and levels would have resulted in 2128 (i.e.  $4^5 \times 2^1$ ) possible scenarios. Therefore, an efficient design, which maximises the statistical efficiency of designs by minimizing the predicted standard errors of the parameter estimates (usually the D-error statistic) was used.[26] An efficient fractional factorial design[26,27] still generated 20 choice sets. To minimise the potential cognitive burden to the respondents, the choice sets were blocked into two, with each block having 10 choice sets (see Figure 1 for a choice set example). The prior[28] estimates of attribute coefficients used were derived from a pilot survey (see below). A further three choice sets were added to each block as tests of transitivity[29,30] and monotonicity[29]- which are tests of theoretical validity and rationality of choice sets used in the DCE. Theoretical validity and rationality checks assessed whether the parameters moved in the expected



1  
2 direction. For example, it was expected that shorter travel time to a hospital is preferred over longer  
3 travel time duration. Further details on transitivity and monotonicity tests used are in the  
4 supplementary file.  
5  
6  
7  
8  
9  
10

11 Altogether, the final design included 13 choice sets in each of the two blocks of DCE choice sets,  
12 which were randomly allocated to participants. Choice sets were defined as efficient design using  
13 Ngene software version 1.1.1.[31]  
14  
15  
16  
17  
18  
19  
20

21 The questionnaire also included questions on socio-demographic information such as gender, age-  
22 group, and generic health information. Also included was a question asking the respondents how  
23 difficult the DCE task was for them. The respondents were asked to make a forced choice between  
24 two alternative hospitals; an opt-out alternative of “no treatment” in a healthcare emergency lacked  
25 realism.  
26  
27  
28  
29  
30  
31  
32  
33  
34

### 35 **Pretesting and piloting**

36  
37 The understanding of the attributes and levels was pre-tested in-house among members of the  
38 Institute of Health & Society, Newcastle University and piloted on a small non-random sample of  
39 potential participants (n=26). Following the pre-test and pilot, the wording and display of the survey  
40 introduction and the choice sets were revised and simplified. The attribute coefficients generated  
41 from the pilot were used as priors in the final questionnaire described earlier.  
42  
43  
44  
45  
46  
47  
48  
49  
50

### 51 **Sample**

52  
53 The survey sample was recruited from the general public over 18 years of age either registered with  
54 Healthwatch Northumberland network or with Northumbria Healthcare NHS Foundation Trust.  
55  
56  
57  
58  
59  
60 Participants were approached between January-April 2016. The sample represented a general

1  
2 population whose EMS had recently been centralised. Grounded on the recommendations to  
3  
4 centralise EMS[3,4], a new specialised emergency care hospital was built at Cramlington in  
5  
6 Northumberland, the first of its kind in the UK, with the aim to provide improved quality of care by  
7  
8 providing faster access to consultants and diagnostics.[10] Before June 2015, the emergency  
9  
10 medical services were provided from the A&E departments at three general hospitals within the area:  
11  
12 North Tyneside, Wansbeck and Hexham. All of these hospitals are operated by Northumbria  
13  
14 Healthcare NHS Foundation Trust and they accounted for 90% of all A&E visits by the population of  
15  
16 Northumberland[10]. The emergency care provided by the three general hospitals was centralised  
17  
18 into the new specialised hospital.  
19

20  
21  
22  
23  
24 Data were collected using postal questionnaires and online. Potential respondents with an email  
25  
26 address registered were sent an electronic link to the survey hosted by an online commercial  
27  
28 platform, Qualtrics ([www.qualtrics.com](http://www.qualtrics.com)). Whereas those without email access were sent a paper-  
29  
30 copy of the survey. Participants previously identified with visual impairments were sent a paper  
31  
32 format of the questionnaire in large font size. The invitation to complete the survey questionnaire  
33  
34 explained a description of each of the characteristics used, and how the responses would be used.  
35  
36 A clear statement of voluntary participation was included.  
37  
38  
39  
40  
41

## 42 **Data analysis**

43  
44  
45 The survey data analysis was based on the random utility framework- the underlying theory that  
46  
47 underpins the DCEs.[32] It has been argued that failure of a validity test would not necessarily mean  
48  
49 the respondent was irrational and deletion of responses that fail the validity tests may result in  
50  
51 removal of valid preferences which may lead to biased results.[29] Moreover, random utility theory  
52  
53 is expected to be robust to such violations in validity tests.[29] Furthermore, qualitative research in  
54  
55 this area[33,34] also revealed that respondents failing the validity tests had rational reasons for doing  
56  
57  
58  
59  
60

1  
2 so. Therefore, all respondents regardless of failing the validity tests were included in the final  
3  
4 analysis.  
5  
6  
7  
8

9 A range of logistic regression modelling approaches were used. Multinomial logit (MNL) (also known  
10 as conditional logit analyses), mixed multinomial logit (MIXL) and generalised multinomial logit  
11 (GMNL) models were fitted to estimate changes in the preference or utility of each attribute.[35] MNL  
12 assumed homogenous choice across the respondent sample and also assessed the significance of  
13 attribute interactions with respondent characteristics. However, the MNL models are based on  
14 assumptions of independence of irrelevant alternatives (IIA), independence and identical distribution  
15 of error terms (IID) across observations and no heterogeneity across respondents. This may be  
16 restrictive and limited in describing human choice behaviour.[35] Therefore the MIXL model,[36,37]  
17 a popular extension of the MNL model was also used, which while keeping the IID and not making  
18 the IIA assumptions eliminates the limitations of MNL and allowed for choice heterogeneity across  
19 respondents. It has been argued that GMNL model allows for the scale heterogeneity by accounting  
20 for some respondents who exhibit more random (i.e. relatively insensitive to attributes) and extreme  
21 choices (i.e. near lexicographic-always choosing a particular attribute regardless of others), and thus  
22 offers a better fit; outperforming the MIXL model.[38] Therefore, GMNL model was also used in the  
23 analysis. A constant term was not included. Akaike information criterion (AIC) and Bayesian  
24 information criterion (BIC) were used as measures of the model fit. The lower the AIC and BIC  
25 measures the more preferred is the model.[39]  
26  
27  
28  
29  
30  
31  
32  
33  
34  
35  
36  
37  
38  
39  
40  
41  
42  
43  
44  
45  
46  
47  
48

49 Marginal rates of substitution (MRS) were calculated, across all models (to account for the models  
50 limitations described earlier), to compare respondent preferences on a common value scale and  
51 understand the trade-offs made between two-attributes. MRS values were computed using travel  
52 time to hospital and time waiting to be seen to present the preferences, so that the trade-offs could  
53  
54  
55  
56  
57  
58  
59  
60

1  
2 be compared in terms of willingness to travel and willingness to wait. All analyses were undertaken  
3  
4 using R statistical programme version 3.2.4.[40]  
5  
6  
7  
8  
9

### 10 **Patient and public involvement**

11  
12 No patient or public were involved in the design, conduct and reporting of this research.  
13  
14 Nevertheless, the priors generated from a pilot study conducted in a sample of general population  
15  
16 informed the design of the DCE survey.  
17  
18  
19  
20  
21

### 22 **Ethics approval**

23  
24  
25 Ethics approval for the DCE survey was provided by Newcastle University Faculty of Medical  
26  
27 Sciences Ethics Committee (approval code 00893/2015). Specific written consent was not obtained  
28  
29 from participants, but they were made aware that the participation in the survey was voluntary and  
30  
31 returning a completed questionnaire was an indication of consent. No personal identifiable  
32  
33 information was collected and all data from participants were anonymous. The survey data and other  
34  
35 related materials were handled in accordance with the Newcastle University's rules and regulations  
36  
37 in place with strict adherence to *The Data Protection Act 1998*, the law in force at the time of the  
38  
39 survey, and the *Newcastle University Information Security Guidelines*  
40  
41 (<http://www.ncl.ac.uk/data.protection/policy.htm>).  
42  
43  
44  
45  
46  
47

### 48 **RESULTS**

49  
50 In total, 148 respondents completed the survey: 62 online and 86 on paper. Whilst the response rate  
51  
52 in the survey sent by post was 13%, it was not possible to assess the response rates in the web  
53  
54 version of the survey as we could not verify how many had received the link. However, the web-link  
55  
56 was opened on 101 occasions and the response rates in terms of those opening the web version  
57  
58  
59  
60

was about 61%. Among the respondents, 44% reported (answered the survey question on difficulty in completing the DCE) some form of difficulty in completing the choice sets.

### Respondent characteristics

Among the 148 respondents, there were almost twice the number of females compared to males (Table 2). Most respondents aged more than 55 years of age. About half of the respondents had some form of emergency experience in the immediate 12 months before the survey. The general health measures (EQ-VAS=75.5, EQ-5D-5L=0.77) is similar to that estimated for the UK general population above 55 years of age.[41]

**Table 2. Summary of respondent characteristics**

| Characteristics         | All           |
|-------------------------|---------------|
| Sample (n)              | 148           |
| Age groups              |               |
| 16-29                   | 4 (2.70%)     |
| 30-34                   | 6 (4.05%)     |
| 35-39                   | 5 (3.37%)     |
| 40-44                   | 4 (2.70%)     |
| 45-49                   | 9 (6.08%)     |
| 50-54                   | 12 (8.10%)    |
| 55-59                   | 19 (12.84%)   |
| 60-64                   | 21 (14.19%)   |
| 65-69                   | 27 (18.24%)   |
| 70-74                   | 17 (11.48%)   |
| 75-79                   | 9 (6.08%)     |
| 80-84                   | 9 (6.08%)     |
| 85+                     | 6 (4.05%)     |
| Gender                  |               |
| Male                    | 49 (33.10%)   |
| Female                  | 98 (66.21%)   |
| Prefer not to reveal    | 1 (0.67%)     |
| Self-reported health    |               |
| Mean EQ-VAS score (SD)  | 75.50 (20.48) |
| Mean EQ-5D-5L score(SD) | 0.77 (0.22)   |
| Emergency experience    |               |
| Yes                     | 78 (52.70%)   |
| No                      | 70 (47.30%)   |

## Regression analysis of the DCE data

Two respondents failed the validity tests. However, an initial regression analysis indicated that the coefficient estimates remained similar regardless of whether those respondents failing the validity tests were included or excluded in the analysis. Therefore, the results on these studies are based on analysis of data from all respondents regardless of failing the validity tests.

Table 3 presents the regression analysis when all the attributes are taken to be continuous. The negative and positive signs in the coefficients indicate preference of a lower level and higher level of an attribute respectively. The coefficient estimates were in line with expectations that individuals would prefer shorter travel time to the hospital, shorter waiting time to receive the service, fewer number of days of length of stay in the hospital, low risk of death, low risk of readmission and outpatient follow-up care after the emergency treatment in their local hospital.

Table 3. Regression results

| Attributes                        | MNL                 | MNL                                    | MIXL                | GMNL              |                    |                   |
|-----------------------------------|---------------------|----------------------------------------|---------------------|-------------------|--------------------|-------------------|
|                                   | (Main effects)      | (Including respondent characteristics) | (Main effects)      |                   | (Main effects)     |                   |
|                                   | Coefficients (SE)   | Coefficients (SE)                      | Coefficients (SE)   | SD (SE)           | Coefficients (SE)  | SD (SE)           |
| <b>Travel Time</b>                | -0.0086 (0.0009)*** | -0.00068 (0.0032)                      | -0.0125 (0.0020)*** | 0.0165(0.0024)*** | -0.0235 (0.0097)*  | 0.0254 (0.0091)** |
| <b>Waiting Time</b>               | -0.0056 (0.0005)*** | -0.00333(0.0015)*                      | -0.0077 (0.0008)*** | 0.0048(0.0009)*** | -0.0146 (0.0059)*  | 0.0078 (0.0028)** |
| <b>Length of Stay</b>             | -0.0768 (0.0152)*** | -0.0784(0.0153)***                     | -0.1217 (0.0262)*** | 0.1608(0.0395)*** | -0.2501 (0.1149)*  | 0.2668 (0.1264)*  |
| <b>Risk of Death</b>              | -0.3258 (0.0202)*** | -0.1953(0.0553)***                     | -0.4623 (0.0425)*** | 0.2577(0.0434)*** | -0.8409 (0.3184)** | 0.3930 (0.1478)** |
| <b>Risk of Readmission</b>        | -0.1442 (0.0159)*** | -0.0192 (0.0518)                       | -0.1803 (0.0262)*** | 0.1384(0.0386)*** | -0.3436 (0.1491)*  | 0.2210 (0.1171)   |
| <b>Outpatient Follow-Up</b>       | -0.9624 (0.0776)*** | -0.9887(0.0792)***                     | -1.2442 (0.1424)*** | 0.7290(0.1826)*** | -2.2214 (0.8883)*  | 1.5190 (0.1478)*  |
| <i>Interaction terms</i>          |                     |                                        |                     |                   |                    |                   |
| <b>Travel Time*Gender</b>         | -                   | -0.0049 (0.0019)**                     | -                   | -                 | -                  | -                 |
| <b>Waiting Time*Gender</b>        | -                   | -0.0021 (0.0009)*                      | -                   | -                 | -                  | -                 |
| <b>Waiting Time*Survey Mode</b>   | -                   | 0.0027 (0.0008)***                     | -                   | -                 | -                  | -                 |
| <b>Risk of Death*Gender</b>       | -                   | -0.1047 (0.0327)**                     | -                   | -                 | -                  | -                 |
| <b>Risk of Death*Survey Mode</b>  | -                   | 0.0862 (0.0291)**                      | -                   | -                 | -                  | -                 |
| <b>Risk of Readmission*Gender</b> | -                   | -0.0775(0.0297)**                      | -                   | -                 | -                  | --                |
| <b>Sample size (Observations)</b> | 148(2960)           | 148(2960)                              | 148(2960)           | -                 | 148 (2960)         | -                 |
| <b>Log Likelihood</b>             | -813                | -800                                   | -763                | -                 | -757               | -                 |
| <b>AIC</b>                        | 1640                | 1623                                   | 1522                | --                | 1544               | -                 |
| <b>BIC</b>                        | 1670                | 1687                                   | 1621                | -                 | 1624               | -                 |

\*\*\*p<0.001, \*\*p<0.01, \*p<0.05; SE=Standard Error, SD= Standard Deviation; AIC= Akaike information criterion; BIC = Bayesian information criterion

1  
2  
3  
4  
5  
6  
7  
8  
9  
10  
11  
12  
13  
14  
15  
16  
17  
18  
19  
20  
21  
22  
23  
24  
25  
26  
27  
28  
29  
30  
31  
32  
33  
34  
35  
36  
37  
38  
39  
40  
41  
42  
43  
44  
45  
46  
47  
48  
49  
50  
51  
52  
53  
54  
55  
56  
57  
58  
59  
60

Table 3 also assessed the significance of attribute interactions with respondent characteristics. None of the attribute interactions with respondent age and self-reported health measures were significant which ruled out important differences in preferences of emergency healthcare because of age and health status. Only interactions (Travel Time\* Gender, Waiting Time \* Gender, Waiting Time\* Survey Mode, Risk of Death\* Gender, Risk of Death\* Survey Mode, Risk of Readmission\*Gender) were significant and these were considered in the final specification (Table 3). Results suggest that men have stronger preferences for shorter travel time (-0.0049,  $p < 0.01$ ), shorter waiting time (-0.0021,  $p < 0.05$ ), lower risk of death (-0.1047,  $P < 0.01$ ) and lower risk of readmission (-0.00775,  $P < 0.01$ ) compared to women. Respondents completing the web-based survey showed stronger preferences for less waiting time (0.0027,  $p < 0.001$ ) and lower risk of death (0.0862,  $p < 0.01$ ) compared to those completing the survey in paper. In the MIXL model, the significance of attributes remained the same as in MNL model, however, lower AIC and BIC in the MIXL indicated that it provided a better model fit compared to MNL model. Furthermore, the MIXL model identified heterogeneity among respondents (shown by the statistically significant standard deviations). This suggested that MIXL was more appropriate than the MNL model. In the GMNL model, the coefficient estimates retained the signs and significance similar to MNL and MIXL.

Table S1 (In Supplementary File) reported the analysis when risk of readmission, risk of death and outpatient follow-up were treated as categorical variables as opposed to continuous variables as they were in Table 3. There was no evidence of any difference in preferences for the different levels of "length of stay" in the MNL model. Furthermore, in all three of the statistical models (MNL, MIXL, GMNL), there was no evidence that preferences for the mild of "risk of death" were any different to the reference category (low risk of death (1 in 100)) across all three models. The magnitude of the coefficients increased in line with the increase in the levels of "risk of readmission" and "outpatient follow-up", however coefficients for increasing levels of "risk of readmission" did not increase in a linear manner and there was no evidence that the mild "risk of readmission" was preferred to low risk of readmission.



### Marginal rates of substitution

1  
2 The coefficients generated from each of the different regression models in Table 3 were used to calculate the  
3  
4 marginal rates of substitution (MRS) in Table 4. The MRS in Model 1A indicated that participants were willing to  
5  
6 travel nine minutes more and willing to wait 14 minutes more for a one day reduction in length of stay in the  
7  
8 hospital. The willingness to travel increased to 38 minutes and the willingness to wait increased to 58 minutes  
9  
10 for one percent reduction in risk of death in hospital. The willingness to travel was 112 minutes and willingness  
11  
12 to wait was 172 minutes for having outpatient follow-up care after the emergency treatment at their local hospital.  
13  
14 In Model 1B the coefficients of travel time and risk of readmission used to generate the MRS were not significant,  
15  
16 therefore the marginal willingness to travel across all attributes and marginal willingness to wait derived for the  
17  
18 attribute risk of readmission were not significant. Nevertheless, the MRS estimates in all the models (except  
19  
20 Model 1B) were generally similar.  
21  
22  
23  
24  
25  
26  
27  
28  
29  
30  
31  
32  
33  
34  
35  
36  
37  
38  
39  
40  
41  
42  
43  
44  
45  
46  
47  
48  
49  
50  
51  
52  
53  
54  
55  
56  
57  
58  
59  
60

Table 4. Marginal rates of substitution in terms of willingness to travel and willingness to wait

| Attributes                  | Marginal rates of substitution |          |          |          |                  |          |          |          | Condition                                                    |
|-----------------------------|--------------------------------|----------|----------|----------|------------------|----------|----------|----------|--------------------------------------------------------------|
|                             | MWT (in minutes)               |          |          |          | MWW (in minutes) |          |          |          |                                                              |
|                             | Model 1A                       | Model 1B | Model 1C | Model 1D | Model 1A         | Model 1B | Model 1C | Model 1D |                                                              |
| <b>Length of stay</b>       | 8.93                           | 115.29   | 9.74     | 10.64    | 13.71            | 23.54    | 15.81    | 17.13    | For 1 day reduction in length of stay in hospital            |
| <b>Risk of Death</b>        | 37.88                          | 287.21   | 36.98    | 35.78    | 58.18            | 58.65    | 60.04    | 57.6     | For 1% reduction in risk of death in hospital                |
| <b>Risk of Readmission</b>  | 16.76                          | 28.24    | 14.42    | 14.62    | 25.75            | 5.77     | 23.42    | 23.53    | For 1% reduction in risk of readmission in hospital          |
| <b>Outpatient Follow-Up</b> | 111.90                         | 1453.97  | 99.54    | 94.53    | 171.85           | 296.91   | 161.58   | 152.2    | For having outpatient follow-up care at their local hospital |

MWT- Marginal willingness to travel; MWW- Marginal willingness to wait; Model 1A- Main effects MNL, Model 1B- With interactions MNL, Model 1C- Main effects MIXL,

Model 1D- Main effects GMNL

## DISCUSSION

### Summary of the findings

This examination of public preferences demonstrated the influence of attributes on the choice of hospitals in an emergency healthcare situation. In general, participants preferred shorter travel times, shorter waiting times, fewer number of days in hospital, low risk of death, low risk of readmission and local outpatient follow-up. Gender influenced the strength of the preference, with results suggesting that men have stronger preferences for shorter travel time, shorter waiting time, lower risk of death and lower risk of readmission compared to women. However, there was no evidence of influence of other characteristics such as age, recent experience of emergency care and current health state of the individual.

The results indicate that if centralisation of emergency medical services increases travel and waiting times, but offered better care in terms of reduced risk of death, reduced length of stay, reduced risk of readmission and provisions for follow-up care in the local hospital, then participants would prefer the centralised service. Travelling 38 minutes longer by ambulance and waiting about an hour more for 1% reduction in risk of dying seems reasonable. The participants valued the opportunity for follow-up at their local hospital more than any other attributes examined in this DCE. Though traveling about 2 hours longer and waiting about 3 hours more may appear unrealistic value placed on local outpatient follow-up, these possibly reflect the feeling of emotional attachment and enormous pride of people towards their local NHS hospital.[42] However, it was also found that the centralised hospital should also not be too far away to be acceptable (not needing more than two hours of additional travel time).

### Comparison with other studies

While differences exist between studies in terms of healthcare context, design, attributes and levels used, the findings of this study are in line with other relevant DCE studies. Earlier studies attempting to quantify the strengths of individual preferences for unscheduled healthcare available during usual GP service hours have indicated that patients prefer shorter waiting times to get a decision on treatment and that services are provided closer to their homes.[20,43] Unlike our study, these studies reported age related differences in strength of preferences: younger age groups (<45 years) held strong preferences with respect to the way of making contact with the healthcare system. A study on Australian public's choice among alternatives of emergency care reported clear preferences for shorter waiting times and strong emphasis on the quality of emergency healthcare service.[44] A significant preference heterogeneity was observed in this study and the strength of the preference changed according to the presenting context and situation such as the perceived severity of illness and who was being treated, but the influence of age and gender was not reported. Another DCE study which examined the factors influencing the choice of hospitals in London patients on waiting lists of range of non-emergency situations demonstrated that individuals prefer shorter travel time to hospital, shorter waiting time to receive the service, the follow-up care at their home hospital and a high valuation of hospital reputation.[19] This study reported differences in preferences in patient related to gender and age. Potential patients in Germany were willing to sacrifice longer travel distance and preferred location of care for a highly specialised surgical care provision with shorter waiting times,[45] but the influence of respondent age and gender was not reported.

It is not surprising that non-emergency situations show similar results. A recent study assessing preferences for centralising specialist cancer services also found that patients, health professionals and the public all prefer shorter travel times, lower risk of death and complications, and better access to specialist centres.[46] However, there was no evidence of

1  
2  
3 differences because of gender, age or place of residence of the respondents. Risk of death  
4 and risk of complications were ranked highly whereas relatively lower importance was given  
5 to travel time.  
6  
7  
8  
9

### 10 11 12 **Implications of the study findings**

13  
14  
15 This study reveals preferences and the trade-offs individuals are willing to make across  
16 hospital attributes when choosing hospitals for emergency healthcare. The findings provide  
17 valuable insights for decision-makers in relation to the centralisation of emergency healthcare  
18 services. Contrary to the concerns about distance decay,[11,12] where the utilisation of  
19 healthcare services decreases with the increase in travel time to healthcare facilities, the  
20 findings suggest that whilst people may place a high value on their local hospital, in an  
21 emergency situation they may be willing to exchange increased journey time for better quality  
22 of care. This assumes that the ambulance response would be the same, and that other  
23 aspects of local services would not be affected. The preferences are not influenced by age,  
24 health status or previous experience of emergency medical services, suggesting that services  
25 do not necessarily have to be tailored according to age-groups or health status, at least within  
26 the range of respondents studied. However, it was observed that there are gender differences  
27 in the strength of the preferences, which could possibly be related to the differences in  
28 knowledge, attitudes and previous healthcare experiences between men and women.[47]  
29  
30 Whilst this finding may specifically reflect this cohort and the smaller number of males that  
31 participated, it is recommended that future researchers and healthcare providers consider  
32 whether decisions and communication about centralising services should be sensitive to  
33 gender differences. Overall, the DCE results support policy recommendations to centralise  
34 emergency medical care in local hospitals into fewer specialised high performing units,[3,4] as  
35 long as journey times are not excessively long and after-care can be provided locally.  
36  
37  
38  
39  
40  
41  
42  
43  
44  
45  
46  
47  
48  
49  
50  
51  
52  
53  
54  
55  
56  
57  
58  
59  
60

## Strengths and limitations

The findings of this study should be interpreted in light of some strengths and limitations. We attempted to study a wide cross section of the local general population representing the preferences of potential users of a newly built emergency hospital. However, it only represents specific population groups registered with the Healthwatch or Northumbria Healthcare NHS Foundation Trust, and sampling bias cannot be ruled out. Whilst DCE offers several advantages over other preference elicitation methods used in healthcare, concerns have been expressed about their external validity.[48] Despite a high proportion of complete and correct responses in the DCE, a number of participants found the choice tasks difficult to complete which could mean the attributes were not appropriate to them and the choices were arbitrarily made. Furthermore, the attributes used in the DCE were taken from the literature without local qualitative research[49] and some other important attributes may have been left out. The attributes and their levels in the choice sets were framed to closely represent the emergency care in NHS England. However, the way the attributes were framed could have influenced the choices made by respondents,[50-52] and it is unclear whether choices would remain the same, if the attributes were framed in the other way, e.g. would preferences have been different if “risk of dying” was framed as “chance of survival”? The presentation of attribute levels only in text formats could have created difficulties for some respondents in understanding the choice sets. Graphics and icons are often superior to text in communicating health information.[53-55] However it has been argued that within a DCE context, independent of educational level and literacy of respondents, words depicting attribute levels lead to more consistent answer patterns and more accurate attribute level interpretation and estimates.[51] The conventional practice of a DCE assumes that respondents choose among alternatives by rationally trading-off across all attributes in their choice set. However emerging evidence suggests that some respondents’ trade-off only a subset of attributes while choosing among alternatives.[56-58] Failing to account for this phenomenon, widely referred to as attribute non-attendance, may lead to biased preference estimates.[59] A number of methods have been

1  
2  
3 proposed in the literature to identify attribute non-attendance, which should be considered by  
4 future studies, such as asking respondents directly if they ignored any of the characteristics,  
5 use of econometric models such as latent class model to establish the probability of attribute  
6 non-attendance and use of eye-tracking technology.[59-61] Finally, the study may not be  
7 generalised to other settings, because pre-existing local influences on experiences and views  
8 will vary, such as historical service performance, demographic mix and healthcare geography.  
9  
10  
11  
12  
13  
14  
15  
16  
17  
18

## 19 **CONCLUSION**

20  
21  
22 This study explored and quantified the strength of individual preferences relating to provision  
23 of emergency medical services. The findings highlight that respondents prefer shorter travel  
24 time, shorter waiting time, fewer number of days in hospital, low risk of death, low risk of  
25 readmission and outpatient follow-up at their local hospital. However, people are willing to  
26 trade-off increased travel time and waiting time for high quality emergency medical care in a  
27 centralised hospital, in line with policy documents recommending centralisation.[3,4]  
28  
29 Decisions to centralise emergency medical services should not only be justified on clinical  
30 grounds and cost savings, but also need to be informed by preferences of potential service  
31 users.  
32  
33  
34  
35  
36  
37  
38  
39  
40  
41  
42  
43  
44  
45  
46  
47  
48  
49  
50  
51

## 52 **Figure 1. Example of choice sets used in the DCE**

### 53 **Acknowledgement**

54 We acknowledge the support from Healthwatch Northumberland and Northumbria Health  
55 Care NHS Foundation Trust (NHCT) in conducting the survey. We thank The Health  
56 Foundation, London for funding this study as a part of improvement science doctoral fellowship  
57 funded by The Health Foundation, London. We also thank the participants of the survey.  
58  
59  
60

**Author contribution:**

All authors conceived the study. NB designed the DCE, implemented the survey, carried out the analyses and wrote the first draft of the manuscript. All authors reviewed, commented, edited the manuscript and approved the final version of the manuscript.

**Funding statement:** This work was funded by The Health Foundation, London.

**Competing interest statement:** No competing interest declared

For peer review only



## References

1. NHS England. The NHS belongs to the people: A call to action. London, 2013.
2. Fahy N, McKee M, Busse R, et al. How to meet the challenge of ageing populations. *BMJ* 2011;**342**:d3815
3. NHS England. Five year forward view. London: NHS England, 2014.
4. NHS England. High quality care for all, now and for future generations: Transforming urgent and emergency care services in England- Urgent and Emergency Care Review End of Phase 1 Report. London: NHS England, 2013.
5. Hunter RM, Davie C, Rudd A, et al. Impact on Clinical and Cost Outcomes of a Centralized Approach to Acute Stroke Care in London: A Comparative Effectiveness Before and After Model. *PLoS ONE* 2013;**8**(8):e70420.
6. Eichler K, Hess S, Chmiel C, et al. Sustained health-economic effects after reorganisation of a Swiss hospital emergency centre: a cost comparison study. *Emergency Medicine Journal* 2014;**31**(10):818-23.
7. Hunter RM, Fulop NJ, Boaden RJ, et al. The potential role of cost-utility analysis in the decision to implement major system change in acute stroke services in metropolitan areas in England. *Health Research Policy and Systems* 2018;**16**(1):23.
8. Kelly C, Hulme C, Farragher T, et al. Are differences in travel time or distance to healthcare for adults in global north countries associated with an impact on health outcomes? A systematic review. *BMJ Open* 2016;**6**(11)
9. Nicholl J, West J, Goodacre S, et al. The relationship between distance to hospital and patient mortality in emergencies: an observational study. *Emergency Medicine Journal* 2007;**24**(9):665-68.

- 1  
2  
3 10. Roberts A, Blunt I, Bardsley M. Focus On: Distance from home to emergency care.  
4  
5 London: The Health Foundation and the Nuffield Trust, 2014.  
6  
7
- 8  
9 11. Raknes G, Hansen E, Hunskaar S. Distance and utilisation of out-of-hours services in a  
10  
11 Norwegian urban/rural district: an ecological study. *BMC Health Services Research*  
12  
13 2013;**13**(1):222.  
14
- 15  
16 12. Turnbull J, Martin D, Lattimer V, et al. Does distance matter? Geographical variation in  
17  
18 GP out-of-hours service use: an observational study. *Br J Gen Pract*  
19  
20 2008;**58**(552):471-7.  
21  
22
- 23  
24 13. Beckert W, Christensen M, Collyer K. Choice of NHS-funded Hospital Services in  
25  
26 England. *The Economic Journal* 2012;**122**(560):400-17.  
27
- 28  
29 14. Ali S, Ronaldson S. Ordinal preference elicitation methods in health economics and  
30  
31 health services research: using discrete choice experiments and ranking methods.  
32  
33 *British Medical Bulletin* 2012;**103**(1):21-44.  
34
- 35  
36 15. Salampessy BH, Veldwijk J, Jantine Schuit A, et al. The Predictive Value of Discrete  
37  
38 Choice Experiments in Public Health: An Exploratory Application. *Patient* 2015  
39
- 40  
41 16. Ryan M, Gerard K, Amaya-Amaya M. *Using Discrete Choice Experiments to Value*  
42  
43 *Health and Health Care*: Springer, 2008.  
44  
45
- 46  
47 17. Ryan M, McIntosh E, Dean T, et al. Trade-offs between location and waiting times in the  
48  
49 provision of health care: the case of elective surgery on the Isle of Wight. *J Public*  
50  
51 *Health Med* 2000;**22**(2):202-10.  
52
- 53  
54 18. Shackley P, Slack R, Michaels J. Vascular patients' preferences for local treatment: an  
55  
56 application of conjoint analysis. *J Health Serv Res Policy* 2001;**6**(3):151-7.  
57  
58  
59  
60

- 1  
2  
3 19. Burge P, Devlin N, Appleby J, et al. London Patient Choice Project Evaluation: A model  
4  
5 of patients' choices of hospital from stated and revealed preference choice data:  
6  
7 RAND Europe & The King's Fund & The City University, 2005.  
8  
9
- 10  
11 20. Gerard K, Lattimer V. Preferences of patients for emergency services available during  
12  
13 usual GP surgery hours: a discrete choice experiment. *Family Practice*  
14  
15 2005;**22**(1):28-36.  
16  
17
- 18  
19 21. Dixon A, Robertson R, Appleby J, et al. Patient Choice: How patients choose and how  
20  
21 providers respond. London: The King's Fund, 2010.  
22
- 23  
24 22. Sorup C, Jacobsen P, Forberg J. Evaluation of emergency department performance - a  
25  
26 systematic review on recommended performance and quality-in-care measures.  
27  
28 *Scandinavian Journal of Trauma, Resuscitation and Emergency Medicine*  
29  
30 2013;**21**(1):62.  
31
- 32  
33 23. The College of Emergency Medicine. Emergency Department Clinical Quality Indicators:  
34  
35 -A CEM guide to implementation. London: The College of Emergency Medicine,  
36  
37 2011.  
38  
39
- 40  
41 24. Cameron PA, Schull MJ, Cooke MW. A framework for measuring quality in the  
42  
43 emergency department. *Emergency Medicine Journal* 2011;**28**(9):735-40.  
44
- 45  
46 25. Acute surveys co-ordination centre for the NHS patient survey programme. The key  
47  
48 findings report for the 2008 emergency department survey: Picker Institute Europe,  
49  
50 2009.  
51
- 52  
53 26. Rose JM, Bliemer MCJ. Constructing Efficient Stated Choice Experimental Designs.  
54  
55 *Transport Reviews* 2009;**29**(5):587-617.  
56  
57
- 58  
59 27. Lancsar E, Louviere J. Conducting discrete choice experiments to inform healthcare  
60  
decision making: a user's guide. *Pharmacoeconomics* 2008;**26**(8):661-77.

- 1  
2  
3 28. Rose JM, Bliemer MCJ, Hensher DA, et al. Designing efficient stated choice experiments  
4  
5 in the presence of reference alternatives. *Transportation Research Part B:*  
6  
7 *Methodological* 2008;**42**(4):395-406.  
8  
9
- 10 29. Lancsar E, Louviere J. Deleting 'irrational' responses from discrete choice experiments: a  
11  
12 case of investigating or imposing preferences? *Health Econ* 2006;**15**(8):797-811.  
13  
14
- 15 30. Ozdemir S, Mohamed AF, Johnson FR, et al. Who pays attention in stated-choice  
16  
17 surveys? *Health Econ* 2010;**19**(1):111-8.  
18  
19
- 20 31. ChoiceMetrics. Ngene 1.1.1 User Manual & Reference Guide. Australia, 2012.  
21  
22
- 23 32. Lancaster KJ. A New Approach to Consumer Theory. *Journal of Political Economy*  
24  
25 1966;**74**(2):132-57.  
26  
27
- 28 33. San Miguel F, Ryan M, Amaya-Amaya M. 'Irrational' stated preferences: a quantitative  
29  
30 and qualitative investigation. *Health Economics* 2005;**14**(3):307-22.  
31  
32
- 33 34. Ryan M, Watson V, Entwistle V. Rationalising the 'irrational': a think aloud study of  
34  
35 discrete choice experiment responses. *Health Economics* 2009;**18**(3):321-36.  
36  
37
- 38 35. de Bekker-Grob EW, Ryan M, Gerard K. Discrete choice experiments in health  
39  
40 economics: a review of the literature. *Health Economics* 2012;**21**(2):145-72.  
41  
42
- 43 36. Hensher DA, Greene WH. The Mixed Logit model: The state of practice. *Transportation*  
44  
45 2003;**30**(2):133-76.  
46  
47
- 48 37. Hess S, Train K. Correlation and Scale in Mixed Logit Models. *Journal of Choice*  
49  
50 *Modelling* 2017;**23**:1-8.  
51  
52
- 53 38. Fiebig DG, Keane MP, Louviere J, et al. The Generalized Multinomial Logit Model:  
54  
55 Accounting for Scale and Coefficient Heterogeneity. *Marketing Science*  
56  
57 2010;**29**(3):393-421.  
58  
59  
60

- 1  
2  
3 39. Hauber AB, Gonzalez JM, Groothuis-Oudshoorn CG, et al. Statistical Methods for the  
4  
5 Analysis of Discrete Choice Experiments: A Report of the ISPOR Conjoint Analysis  
6  
7 Good Research Practices Task Force. *Value Health* 2016;**19**(4):300-15.  
8  
9
- 10 40. R Core Team. R: A language and environment for statistical computing. R Foundation for  
11  
12 Statistical Computing, Vienna, Austria., 2016.  
13  
14
- 15 41. Janssen B, Szende A. Population Norms for the EQ-5D. In: Szende A, Janssen B,  
16  
17 Cabases J, eds. Self-Reported Population Health: An International Perspective  
18  
19 based on EQ-5D. Dordrecht: Springer Netherlands, 2014:19-30.  
20  
21  
22
- 23 42. Thomson M, MacInnis DJ, Whan Park C. The Ties That Bind: Measuring the Strength of  
24  
25 Consumers' Emotional Attachments to Brands. *Journal of Consumer Psychology*  
26  
27 2005;**15**(1):77-91.  
28  
29
- 30 43. Gerard K, Lattimer V, Turnbull J, et al. Reviewing emergency care systems 2: measuring  
31  
32 patient preferences using a discrete choice experiment. *Emergency Medicine Journal*  
33  
34 2004;**21**(6):692-97.  
35  
36
- 37 44. Harris P, Whitty JA, Kendall E, et al. The Australian public's preferences for emergency  
38  
39 care alternatives and the influence of the presenting context: a discrete choice  
40  
41 experiment. *BMJ Open* 2015;**5**(4)  
42  
43  
44
- 45 45. Schwappach DL, Strasmann TJ. Does location matter? A study of the public's  
46  
47 preferences for surgical care provision. *J Eval Clin Pract* 2007;**13**(2):259-64.  
48  
49
- 50 46. Vallejo-Torres L, Melnychuk M, Vindrola-Padros C, et al. Discrete-choice experiment to  
51  
52 analyse preferences for centralizing specialist cancer surgery services. *Br J Surg*  
53  
54 2018;**105**(5):587-96.  
55  
56  
57  
58  
59  
60

- 1  
2  
3 47. Wessels H, de Graeff A, Wynia K, et al. Gender-Related Needs and Preferences in  
4  
5 Cancer Care Indicate the Need for an Individualized Approach to Cancer Patients.  
6  
7 *The Oncologist* 2010;**15**(6):648-55.  
8  
9
- 10 48. Quaife M, Terris-Prestholt F, Di Tanna GL, et al. How well do discrete choice  
11  
12 experiments predict health choices? A systematic review and meta-analysis of  
13  
14 external validity. *The European Journal of Health Economics* 2018  
15  
16
- 17 49. Vass C, Rigby D, Payne K. The Role of Qualitative Research Methods in Discrete  
18  
19 Choice Experiments. *Med Decis Making* 2017;**37**(3):298-313.  
20  
21
- 22 50. Kragt M, Bennett J. Attribute Framing in Choice Experiments: How Do Attribute Level  
23  
24 Descriptions Affect Value Estimates? *Environmental and Resource Economics*  
25  
26 2012;**51**(1):43-59.  
27  
28
- 29 51. Veldwijk J, Lambooi MS, van Til JA, et al. Words or graphics to present a Discrete  
30  
31 Choice Experiment: Does it matter? *Patient Educ Couns* 2015;**98**(11):1376-84.  
32  
33
- 34 52. Veldwijk J, Essers BAB, Lambooi MS, et al. Survival or Mortality: Does Risk Attribute  
35  
36 Framing Influence Decision-Making Behavior in a Discrete Choice Experiment?  
37  
38 *Value in Health* 2016;**19**(2):202-09.  
39  
40
- 41 53. Tait AR, Voepel-Lewis T, Zikmund-Fisher BJ, et al. Presenting research risks and  
42  
43 benefits to parents: does format matter? *Anesth Analg* 2010;**111**(3):718-23.  
44  
45
- 46 54. Tait AR, Voepel-Lewis T, Zikmund-Fisher BJ, et al. The effect of format on parents'  
47  
48 understanding of the risks and benefits of clinical research: a comparison between  
49  
50 text, tables, and graphics. *J Health Commun* 2010;**15**(5):487-501.  
51  
52
- 53 55. McCaffery KJ, Dixon A, Hayen A, et al. The influence of graphic display format on the  
54  
55 interpretations of quantitative risk information among adults with lower education and  
56  
57 literacy: a randomized experimental study. *Med Decis Making* 2012;**32**(4):532-44.  
58  
59  
60

- 1  
2  
3 56. Hensher DA, Rose J, Greene WH. The implications on willingness to pay of respondents  
4 ignoring specific attributes. *Transportation* 2005;**32**(3):203-22.  
5  
6  
7  
8 57. Carlsson F, Kataria M, Lampi E. Dealing with Ignored Attributes in Choice Experiments  
9 on Valuation of Sweden's Environmental Quality Objectives. *Environmental and*  
10 *Resource Economics* 2010;**47**(1):65-89.  
11  
12  
13  
14  
15 58. Colombo S, Christie M, Hanley N. What are the consequences of ignoring attributes in  
16 choice experiments? Implications for ecosystem service valuation. *Ecological*  
17 *Economics* 2013;**96**:25-35.  
18  
19  
20  
21  
22 59. Hensher DA, Greene WH. Non-attendance and dual processing of common-metric  
23 attributes in choice analysis: a latent class specification. *Empirical Economics*  
24 2010;**39**(2):413-26.  
25  
26  
27  
28  
29 60. Hole AR, Kolstad JR, Gyrð-Hansen D. Inferred vs. stated attribute non-attendance in  
30 choice experiments: A study of doctors' prescription behaviour. *Journal of Economic*  
31 *Behavior & Organization* 2013;**96**:21-31.  
32  
33  
34  
35  
36  
37 61. Spinks J, Mortimer D. Lost in the crowd? Using eye-tracking to investigate the effect of  
38 complexity on attribute non-attendance in discrete choice experiments. *BMC Med*  
39 *Inform Decis Mak* 2016;**16**:14.  
40  
41  
42  
43  
44  
45  
46  
47  
48  
49  
50  
51  
52  
53  
54  
55  
56  
57  
58  
59  
60

1  
2  
3  
4  
5  
6  
7  
8  
9  
10  
11  
12  
13  
14  
15  
16  
17  
18  
19  
20  
21  
22  
23  
24  
25  
26  
27  
28  
29  
30  
31  
32  
33  
34  
35  
36  
37  
38  
39  
40  
41  
42  
43  
44  
45  
46  
47  
48  
49  
50  
51  
52  
53  
54  
55  
56  
57  
58  
59  
60

Suppose you have an emergency healthcare need which required calling an ambulance. Below are two hospitals, hospital A and hospital B, each with different characteristics. If you have a choice, which hospital would you choose from below?

| Characteristics                                                                              | Hospital A                                                                | Hospital B                      |
|----------------------------------------------------------------------------------------------|---------------------------------------------------------------------------|---------------------------------|
| Travel time to hospital                                                                      | 1 and half hours                                                          | 1 hour                          |
| Waiting time in the A&E department to be seen by a doctor or nurse who can provide treatment | 4 hours or more                                                           | Less than 30 minutes            |
| Length of stay at the hospital before going home                                             | 3 days                                                                    | 5 days                          |
| Risk of dying from the illness (.patients die)                                               | Moderate<br>(5 in 100 patients)                                           | Mild<br>(3 in 100 patients)     |
| Risk of being re-admitted to the hospital after going home                                   | Mild<br>(3 in 100 patients)                                               | Moderate<br>(5 in 100 patients) |
| Outpatient care after emergency treatment                                                    | At a hospital which about an extra 1 hour travel time from local hospital | Local hospital                  |

Which hospital would you chose to go in emergency? (Please tick only one box at the right)

Figure 1. Example of choice sets used in the DCE

108x60mm (300 x 300 DPI)



### Transitivity and Monotonicity

Transitivity implies if A is preferred to B and B is preferred to C, then A should be preferred to C.[1] In each of the blocks of questionnaire, choice set number 3 with alternatives as hospital A and hospital B (i.e. from the choice design) was taken as a base for the transitivity test. The questions used for the transitivity test were spread out evenly as possible across the choice task. Therefore, another choice set number 6 was manually added (to the choice design) keeping hospital B attribute levels the same as in the choice set 3 but with a new alternative, hospital C with completely different attribute levels. Another additional choice set number 9 was manually added taking characteristics of hospital A from the choice set 3 and characteristics of hospital C from choice set 6. In short, the transitivity test was structured as follows:

Choice set number 3: Hospital A=A, Hospital B=B

Choice set number 6: Hospital A=B, Hospital B=C

Choice set number 9: Hospital A=A, Hospital B=C

However, in the questionnaire in each of the choice sets the alternatives were named as hospital A and hospital B. So, if the respondent made choices in a cyclic order (prefer A to B and prefer B to C and prefer C to A; prefer B to A, C to B, and then prefer A to C), the choice was considered intransitive and thus irrational.

Though not essential for rationality, monotonicity, is a desirable axiom of consumer theory and implies that more is preferred to less.[2] Therefore, another choice set number 12 where one hospital alternative was obviously dominant in terms of all attributes was manually added (to the choice design). It was assumed that individuals preferred the alternative with shorter travel time, shorter waiting time, low risk of mortality, low risk of readmission, shorter length of stay and outpatient follow-up at their local hospital. Any violation of monotonicity axiom in the respondent choices was considered irrational.

## Reference:

1. Ozdemir S, Mohamed AF, Johnson FR, et al. Who pays attention in stated-choice surveys? Health economics 2010;19:111-8.
2. Lancsar E, Louviere J. Deleting 'irrational' responses from discrete choice experiments: a case of investigating or imposing preferences? Health economics 2006;15:797-811.

Table S1. Regression results after recoding selected variables as categorical

| Attributes                        | MNL                 | MIXL                |                    | GMNL                |                    |
|-----------------------------------|---------------------|---------------------|--------------------|---------------------|--------------------|
|                                   | (Main effects)      | (Main effects)      |                    | (Main effects)      |                    |
|                                   | Coefficients (SE)   | Coefficients (SE)   | SD (SE)            | Coefficients (SE)   | SD (SE)            |
| <b>Travel Time</b>                | -0.0065 (0.0009)*** | -0.0094 (0.0020)*** | 0.0160 (0.0026)*** | -0.0105 (0.0022)*** | 0.0165(0.0026)***  |
| <b>Waiting Time</b>               | -0.0039 (0.0007)*** | -0.0051 (0.0010)*** | 0.0046 (0.0010)*** | -0.006 (0.0013)***  | 0.0049 (0.0010)*** |
| <b>Length of Stay</b>             | -0.0277 (0.0168)    | -0.0608 (0.0265)*   | 0.1459 (0.0429)*** | -0.0744 (0.0302)*   | 0.1541 (0.0419)*** |
| <b>Risk of Death</b>              |                     |                     |                    |                     |                    |
| (Base level: Low (1 in 100))      |                     |                     |                    |                     |                    |
| Mild (3 in 100)                   | -0.6103 (0.319)     | -0.3169 (0.4903)    | 0.2563 (0.6952)    | -0.6024 (0.5483)    | 0.2919 (0.3664)    |
| Moderate (5 in 100)               | -1.8155 (0.288)***  | -2.0607 (0.4388)*** | 0.3318 (0.5390)    | -2.4479 (0.5104)*** | 0.0473 (0.4896)    |
| High (7 in 100)                   | -1.5249 (0.161)***  | -2.1425 (0.2830)*** | 1.3199 (0.2785)*** | -2.4847 (0.3624)*** | 1.3312 (0.2726)*** |
| <b>Risk of Readmission</b>        |                     |                     |                    |                     |                    |
| (Base level: Low (1 in 100))      |                     |                     |                    |                     |                    |
| Mild (3 in 100)                   | 0.3326 (0.1296)*    | 0.3297 (0.1864)     | 0.3266 (0.6027)    | 0.4436 (0.2119)*    | 0.5174 (0.2913)    |
| Moderate (5 in 100)^              | -                   | -                   | -                  | -                   | -                  |
| High (7 in 100)                   | -0.7728 (0.1219)*** | -0.9753 (0.1986)*** | 0.7813 (0.2846)**  | -1.1345 (0.2297)*** | 0.8667 (0.2689)*** |
| <b>Outpatient Follow-Up</b>       |                     |                     |                    |                     |                    |
| (Base level: Local hospital)      |                     |                     |                    |                     |                    |
| Distant hospital                  | -0.8455 (0.1027)*** | -1.0647 (0.1808)*** | 0.9440 (0.1821)*** | -1.2177 (0.2222)*** | 1.0642 (0.1940)*** |
| <b>Sample size (Observations)</b> | 148(2960)           | 148(2960)           | -                  | 148 (2960)          | -                  |
| <b>Log Likelihood</b>             | -796                | -751                | -                  | -747                | -                  |
| <b>AIC</b>                        | 1612                | 1539                | -                  | 1533                | -                  |
| <b>BIC</b>                        | 1680                | 1640                | -                  | 1647                | -                  |

\*\*\*p<0.001, \*\*p<0.01, \*p<0.05; SE=Standard Error, SD= Standard Deviation; AIC= Akaike information criterion; BIC = Bayesian information criterion, ^ could not be estimated because of collinearity issues

# BMJ Open

## Preferences for centralised emergency medical services: a discrete choice experiment

|                                 |                                                                                                                                                                                                                                                                                                                     |
|---------------------------------|---------------------------------------------------------------------------------------------------------------------------------------------------------------------------------------------------------------------------------------------------------------------------------------------------------------------|
| Journal:                        | <i>BMJ Open</i>                                                                                                                                                                                                                                                                                                     |
| Manuscript ID                   | bmjopen-2019-030966.R1                                                                                                                                                                                                                                                                                              |
| Article Type:                   | Original research                                                                                                                                                                                                                                                                                                   |
| Date Submitted by the Author:   | 09-Oct-2019                                                                                                                                                                                                                                                                                                         |
| Complete List of Authors:       | Bhattarai, Nawaraj; Newcastle University, Institute of Health & Society<br>Mcmeekin, Peter; University of Northumbria at Newcastle, Faculty of Health and Life Sciences<br>Price, Christopher I; Newcastle University, Institute of Neuroscience<br>Vale, Luke; Newcastle University, Institute of Health & Society |
| <b>Primary Subject Heading</b>: | Emergency medicine                                                                                                                                                                                                                                                                                                  |
| Secondary Subject Heading:      | Health economics, Health policy, Health services research                                                                                                                                                                                                                                                           |
| Keywords:                       | ACCIDENT & EMERGENCY MEDICINE, HEALTH ECONOMICS, Organisation of health services < HEALTH SERVICES ADMINISTRATION & MANAGEMENT                                                                                                                                                                                      |
|                                 |                                                                                                                                                                                                                                                                                                                     |

SCHOLARONE™  
Manuscripts

1  
2 **Title:** Preferences for centralised emergency medical services: a discrete choice experiment  
3  
4

5 **Authors:** Nawaraj Bhattarai<sup>1</sup>, Peter McMeekin<sup>2</sup>, Christopher Price<sup>3</sup>, Luke Vale<sup>1</sup>  
6

- 7 1. Institute of Health & Society, Newcastle University, Newcastle upon Tyne,  
8 United Kingdom  
9  
10 2. Faculty of Health and Life Sciences, University of Northumbria in Newcastle,  
11 Newcastle upon Tyne, United Kingdom  
12  
13 3. Institute of Neuroscience, Newcastle University, Newcastle upon Tyne, United  
14 Kingdom  
15  
16

17  
18 **Corresponding Author:**  
19

20 Nawaraj Bhattarai

21  
22 E-mail: [nawaraj.bhattarai@newcastle.ac.uk](mailto:nawaraj.bhattarai@newcastle.ac.uk)  
23

24 Phone: 01912087821  
25

26 Institute of Health and Society  
27

28 Newcastle University  
29

30 Baddiley-Clark Building  
31

32 Richardson Road  
33

34 Newcastle upon Tyne  
35

36 NE2 4AX, United Kingdom  
37  
38

39 **Key words:** preferences, discrete choice experiment, centralisation, emergency medical services  
40  
41

42  
43 **Word count:** 4570  
44  
45  
46  
47  
48  
49  
50  
51  
52  
53  
54  
55  
56  
57  
58  
59  
60

## ABSTRACT

### Objectives

It is desirable that public preferences are established and incorporated in emergency healthcare reforms. The aim of this study was to investigate preferences for local versus centralised provision of all emergency medical services (EMS) and explore what individuals think are important considerations for EMS delivery.

### Design

A discrete choice experiment was conducted. The attributes used in the choice scenarios were: travel time to the hospital, waiting time to be seen, length of stay in the hospital, risks of dying, readmission, and opportunity for outpatient care after emergency treatment at a local hospital.

### Setting

North East England

### Participants

Participants were a randomly sampled general population, aged 16 years or above recruited from Healthwatch Northumberland network database of lay members and from clinical contact with Northumbria Health Care NHS Foundation Trust via Patient Experience Team.

### Primary and Secondary Outcome measures

Analysis used logistic regression modelling techniques to determine the preference of each attribute. Marginal rates of substitution between attributes were estimated to understand the trade-offs individuals were willing to make.

## Results

Responses were obtained from 148 people (62 completed a web and 86 a postal version). Respondents preferred shorter travel time to hospital, shorter waiting time, fewer number of days in hospital, low risk of death, low risk of readmission and outpatient-follow up care in their local hospital. However, individuals were willing to trade-off increased travel time and waiting time for high quality centralised care. Individuals were willing to travel nine minutes more for a one day reduction in length of stay in the hospital, 38 minutes for a 1% reduction in risk of death and 112 minutes for having outpatient follow-up care at their local hospital.

## Conclusions

People value centralised EMS if it provides higher quality care and are willing to travel further and wait longer.

## Strengths and limitations of this study

- The findings of this study might inform decision makers redesigning emergency medical services about preferences of potential users of that service.
- Participants were randomly sampled from specific population groups registered with Healthwatch or Northumbria Healthcare NHS Foundation Trust, and therefore may not represent the general population.
- The attributes used in the DCE and their levels were framed to closely represent emergency care in NHS England, however some other important attributes may have been left out.

## BACKGROUND

The National Health Services (NHS) in the United Kingdom (UK) faces growing service demands and costs which threaten its sustainability and financial stability.[1] A radical and transformative change is essential for the NHS to maintain safety and quality, but this may reduce immediate access to care for some patients. Increased funding could be a part of the solution but the NHS budget is limited. While all areas of healthcare face challenges and major changes in service provision, those faced by acute hospitals are significant because outcomes can depend upon time-critical treatments, demand is rising annually and they are supported by a major proportion of the healthcare budget.[2]

In the UK, consolidation of specialised medical care is one of the service models envisaged by the NHS "Five year forward view".[3] It is recommended that emergency care be reconfigured into larger specialised emergency units providing earlier multidisciplinary expertise and associated facilities.[4] Whilst there exists some condition specific evidence that centralisation of specialist services yields better clinical outcomes and savings,[5-7] there are arguments against centralisation in term of poorer access, increased travel time and costs, as well as preferences expressed by patients and the public around the provision of local services.[8-12]

Understanding public preferences about the location and nature of healthcare providers has become an important influence upon policy and many European countries have incorporated this information into decisions about the organisation of their healthcare systems.[13] Incorporating patient views in healthcare policy decisions may improve the uptake and efficiency of services. Including patient/public views may also lead to better quality research on treatments and service provision. However, little is known about preferences for the centralisation of emergency medical services.



1  
2 The aim of this study was to examine public preferences for the different attributes of centralised  
3 emergency medical services in England, reported using trade-offs between attributes which reflect  
4 the key consequences.  
5  
6  
7  
8  
9  
10

## 11 **METHODS**

12  
13  
14 A discrete choice experiment (DCE) was used to explore preferences. DCEs provide rich data  
15 sources for economic evaluation and decision-making and offer several other advantages compared  
16 to other stated preference elicitation methods.[14,15] DCEs involve presenting individuals with a  
17 series of hypothetical choices which differ in attributes (characteristics) and their magnitude or levels,  
18 and ask them to choose the alternative they prefer in each set. The choices that individuals make  
19 from a DCE survey enable researchers to understand the value that individuals place on various  
20 levels of healthcare provision attributes. A DCE also allows quantification of the relative importance  
21 of attributes in terms of willingness to pay and marginal rates of substitution.[16]  
22  
23  
24  
25  
26  
27  
28  
29  
30  
31  
32  
33  
34

### 35 **Attributes and level**

36  
37 The attributes associated with centralisation were identified from literature[17-21] and also reflected  
38 the key performance measures commonly used in emergency medical services[22] and key quality  
39 indicators in NHS England (Table 1).[10,23,24] A long list of attributes and their levels were identified  
40 from the literature, but the list was shortened based on their relative importance in our study and for  
41 the NHS. After discussions within the research team which also consisted of an experienced senior  
42 clinician working in emergency medicine, the identified attributes were assigned discrete levels that  
43 were likely to be applicable within the UK NHS and closely reflected the reality.[25] The design was  
44 kept as simple as possible so that respondents can make a trade-off easily.  
45  
46  
47  
48  
49  
50  
51  
52  
53  
54  
55  
56  
57  
58  
59  
60

**Table 1. Attributes and levels used in the DCE**

| Attributes                                                                                   | Levels                                                                                                                        |
|----------------------------------------------------------------------------------------------|-------------------------------------------------------------------------------------------------------------------------------|
| Travel time to hospital                                                                      | < 30 min, 1 hour, 1 and half hours, 2 hours or more                                                                           |
| Waiting time in the A&E department to be seen by a doctor or nurse who can provide treatment | 30 min, 1 hour, 2 and half hours, 4 hours or more                                                                             |
| Length of stay at the hospital before going home                                             | 1 day or less, 3 days, 5 days, 6 days or more                                                                                 |
| Risk of dying from the illness                                                               | Low (Less than 1 in 100 patients), Mild (3 in 100 patients), Moderate (5 in 100 patients), High (More than 7 in 100 patients) |
| Risk of being re-admitted to the hospital after going home                                   | Low (Less than 1 in 100 patients), Mild (3 in 100 patients), Moderate (5 in 100 patients), High (More than 7 in 100 patients) |
| Outpatient care after emergency treatment                                                    | At your Local hospital, At a hospital which is about an extra 1 hour travel time from your local hospital                     |

### Questionnaire design

A full factorial design incorporating all possible combinations of attributes and levels would have resulted in 2048 (i.e.  $4^5 \times 2^1$ ) possible scenarios. Therefore, an efficient design, which maximises the statistical efficiency of designs by minimizing the predicted standard errors of the parameter estimates (usually the D-error statistic) was used.[26] An efficient fractional factorial design[26,27] still generated 20 choice sets. To minimise the potential cognitive burden to the respondents, the choice sets were blocked into two, with each block having 10 choice sets (see Figure 1 for a choice set example). The generation of efficient design requires a priori knowledge of attributes used in the choice model.[28] The prior[28] estimates of attribute coefficients used in the final efficient design were derived from a pilot survey (see below). A further three choice sets were added to each block as tests of transitivity[29,30] and monotonicity[29]- which are tests of theoretical validity and

1  
2 rationality of choice sets used in the DCE. Theoretical validity and rationality checks assessed  
3  
4 whether the parameters moved in the expected direction. For example, it was expected that shorter  
5  
6 travel time to a hospital is preferred over longer travel time duration. Further details on transitivity  
7  
8 and monotonicity tests used are in the supplementary file.  
9

10  
11  
12  
13  
14 Altogether, the final design included 13 choice sets in each of the two blocks of DCE choice sets,  
15  
16 which were randomly allocated to participants. Choice sets were defined as efficient design using  
17  
18 Ngene software version 1.1.1.[31]  
19

20  
21  
22  
23 The questionnaire also included questions on socio-demographic information such as gender, age-  
24  
25 group, and generic health information. Also included was a question asking the respondents how  
26  
27 difficult the DCE task was for them. The respondents were asked to make a forced choice between  
28  
29 two alternative hospitals; an opt-out alternative of “no treatment” in a healthcare emergency lacked  
30  
31 realism. The questionnaire used in the survey are in supplementary file.  
32  
33  
34  
35  
36

### 37 **Pretesting and piloting**

38  
39  
40 The understanding of the attributes and levels was pre-tested in-house among members of the  
41  
42 Institute of Health & Society, Newcastle University and piloted on a small non-random sample of  
43  
44 potential participants (n=26). Following the pre-test and pilot, the wording and display of the survey  
45  
46 introduction and the choice sets were revised and simplified. The attribute coefficients generated  
47  
48 from the pilot were used as priors to generate the final questionnaire design as described earlier.  
49  
50 The priors generated from the pilot are presented in the supplementary file: Table S1.  
51  
52  
53  
54  
55  
56  
57  
58  
59  
60

## Sample

The survey sample was recruited from the general public over 16 years of age either registered with Healthwatch Northumberland network database of lay members or with clinical contact with Northumbria Healthcare NHS Foundation Trust and accessed via the Patient Experience Team. Participants were approached between January-April 2016. The sample represented a general population whose EMS had recently been centralised. Grounded on the recommendations to centralise EMS[3,4], a new specialised emergency care hospital was built at Cramlington in Northumberland, the first of its kind in the UK, with the aim to provide improved quality of care by providing faster access to consultants and diagnostics.[10] Before June 2015, the emergency medical services were provided from the A&E departments at three general hospitals within the area: North Tyneside, Wansbeck and Hexham. All of these hospitals are operated by Northumbria Healthcare NHS Foundation Trust and they accounted for 90% of all A&E visits by the population of Northumberland[10]. The emergency care provided by the three general hospitals was centralised into the new specialised hospital.

Sample size estimation methods in healthcare DCE studies are currently developing[32]. Therefore, the sample required for this study was estimated following the rule of thumb suggested by Johnson and Orme[32-34] using the equation  $N > 500L/TA$  where  $L$  is the largest number of levels for any of the choice attributes,  $T$  is the number of choice sets and  $A$  is the number of alternatives assessed. The required minimum sample was estimated as 100 respondents. However, much larger sample was targeted to allow for heterogeneity between respondents.

Data were collected using postal questionnaires and online. Potential respondents with an email address registered were sent an electronic link to the survey hosted by an online commercial platform, Qualtrics ([www.qualtrics.com](http://www.qualtrics.com)). Whereas those without email access were sent a paper-copy of the survey. Participants previously identified with visual impairments were sent a paper format of the questionnaire in large font size. The invitation to complete the survey questionnaire

1 explained a description of each of the characteristics used, and how the responses would be used.  
2  
3  
4 A clear statement of voluntary participation was included.  
5  
6  
7  
8  
9

## 10 **Data analysis**

11  
12 The survey data analysis was based on the random utility framework- the underlying theory that  
13 underpins the DCEs.[35] It has been argued that failure of a validity test would not necessarily mean  
14 the respondent was irrational and deletion of responses that fail the validity tests may result in  
15 removal of valid preferences which may lead to biased results.[29] Moreover, random utility theory  
16 is expected to be robust to such violations in validity tests.[29] Furthermore, qualitative research in  
17 this area[36,37] also revealed that respondents failing the validity tests had rational reasons for doing  
18 so. Therefore, all respondents regardless of failing the validity tests were included in the final  
19 analysis.  
20  
21  
22  
23  
24  
25  
26  
27  
28  
29  
30  
31  
32

33 A range of logistic regression modelling approaches were used. Multinomial logit (MNL) (also known  
34 as conditional logit analyses), mixed multinomial logit (MIXL) and generalised multinomial logit  
35 (GMNL) models were fitted to estimate changes in the preference or utility of each attribute.[38] MNL  
36 assumed homogenous choice across the respondent sample and also assessed the significance of  
37 attribute interactions with respondent characteristics. However, the MNL models are based on  
38 assumptions of independence of irrelevant alternatives (IIA), independence and identical distribution  
39 of error terms (IID) across observations and no heterogeneity across respondents. This may be  
40 restrictive and limited in describing human choice behaviour.[38] Therefore the MIXL model,[39,40]  
41 a popular extension of the MNL model was also used, which while keeping the IID and not making  
42 the IIA assumptions eliminates the limitations of MNL and allowed for choice heterogeneity across  
43 respondents. It has been argued that GMNL model allows for the scale heterogeneity by accounting  
44 for some respondents who exhibit more random (i.e. relatively insensitive to attributes) and extreme  
45 choices (i.e. near lexicographic-always choosing a particular attribute regardless of others), and thus  
46  
47  
48  
49  
50  
51  
52  
53  
54  
55  
56  
57  
58  
59  
60

1 offers a better fit; outperforming the MIXL model.[41] Therefore, GMNL model was also used in the  
2 analysis. A constant term was not included. Akaike information criterion (AIC) and Bayesian  
3 information criterion (BIC) were used as measures of the model fit. The lower the AIC and BIC  
4 measures the more preferred is the model.[42]  
5  
6  
7  
8  
9

10  
11  
12  
13  
14 Marginal rates of substitution (MRS) were calculated, across all models (to account for the models  
15 limitations described earlier), to compare respondent preferences on a common value scale and  
16 understand the trade-offs made between two-attributes. MRS values were computed using travel  
17 time to hospital and time waiting to be seen to present the preferences, so that the trade-offs could  
18 be compared in terms of willingness to travel and willingness to wait. All analyses were undertaken  
19 using R statistical programme version 3.2.4.[43]  
20  
21  
22  
23  
24  
25  
26  
27  
28  
29

### 30 **Patient and public involvement**

31  
32 No patient or public were involved in the design, conduct and reporting of this research.  
33 Nevertheless, the priors generated from a pilot study conducted in a sample of general population  
34 informed the design of the DCE survey.  
35  
36  
37  
38  
39  
40  
41

### 42 **Ethics approval**

43  
44  
45 Ethics approval for the DCE survey was provided by Newcastle University Faculty of Medical  
46 Sciences Ethics Committee (approval code 00893/2015). Specific written consent was not obtained  
47 from participants, but they were made aware that the participation in the survey was voluntary and  
48 returning a completed questionnaire was an indication of consent. No personal identifiable  
49 information was collected and all data from participants were anonymous. The survey data and other  
50 related materials were handled in accordance with the Newcastle University's rules and regulations  
51 in place with strict adherence to *The Data Protection Act 1998*, the law in force at the time of the  
52  
53  
54  
55  
56  
57  
58  
59  
60

1  
2 survey, and the *Newcastle University Information Security Guidelines*  
3  
4 (<http://www.ncl.ac.uk/data.protection/policy.htm>).  
5  
6  
7  
8

## 9 **RESULTS**

10  
11  
12 In total, 148 respondents completed the survey: 62 online and 86 on paper. Whilst the response rate  
13  
14 in the survey sent by post was 13%, it was not possible to assess the response rates in the web  
15  
16 version of the survey as we could not verify how many had received the link. However, the web-link  
17  
18 was opened on 101 occasions and the response rates in terms of those opening the web version  
19  
20 was about 61%. Among the respondents, 44% reported (answered the survey question on difficulty  
21  
22 in completing the DCE) some form of difficulty in completing the choice sets.  
23  
24  
25  
26  
27

### 28 **Respondent characteristics**

29  
30  
31 Among the 148 respondents, there were almost twice the number of females compared to males  
32  
33 (Table 2). Most respondents aged more than 55 years of age. About half of the respondents had  
34  
35 some form of emergency experience in the immediate 12 months before the survey. The health  
36  
37 related quality of life (EQ-VAS=75.5, EQ-5D-5L=0.77) is similar to that estimated for the UK general  
38  
39 population above 55 years of age (which is EQ-VAS=77.6; EQ-5D=0.77).[44]  
40  
41  
42  
43  
44  
45  
46  
47  
48  
49  
50  
51  
52  
53  
54  
55  
56  
57  
58  
59  
60

**Table 2. Summary of respondent characteristics**

| Characteristics                | All          |
|--------------------------------|--------------|
| Sample (n)                     | 148          |
| Age groups                     |              |
| 16-29                          | 4 (2.7%)     |
| 30-34                          | 6 (4.0%)     |
| 35-39                          | 5 (3.4%)     |
| 40-44                          | 4 (2.7%)     |
| 45-49                          | 9 (6.1%)     |
| 50-54                          | 12 (8.1%)    |
| 55-59                          | 19 (12.8%)   |
| 60-64                          | 21 (14.2%)   |
| 65-69                          | 27 (18.0%)   |
| 70-74                          | 17 (11.5%)   |
| 75-79                          | 9 (6.1%)     |
| 80-84                          | 9 (6.1%)     |
| 85+                            | 6 (4.0%)     |
| Gender                         |              |
| Male                           | 49 (33.1%)   |
| Female                         | 98 (66.2%)   |
| Prefer not to reveal           | 1 (0.7%)     |
| Health related quality of life |              |
| Mean EQ-VAS score (SD)         | 75.50 (20.5) |
| Mean EQ-5D-5L score(SD)        | 0.77 (0.2)   |
| Emergency experience           |              |
| Yes                            | 78 (52.7%)   |
| No                             | 70 (47.3%)   |

**Regression analysis of the DCE data**

Two respondents failed the validity tests. However, an initial regression analysis indicated that the coefficient estimates remained similar regardless of whether those respondents failing the validity tests were included or excluded in the analysis. Therefore, the results on these studies are based on analysis of data from all respondents regardless of failing the validity tests.

Table 3 presents the regression analysis when all the attributes are taken to be continuous. In the “travel time” and “waiting time” attributes where the levels had “less than” or “more than” categories, only the number of minutes were used, for example 30 minutes for “less than 30 minutes”. The outpatient follow up was coded as “0” for local hospital and “1” for a distant hospital. The negative



1  
2 and positive signs in the coefficients indicate preference of a lower level and higher level of an  
3  
4 attribute respectively. The coefficient estimates were in line with expectations that individuals would  
5  
6 prefer shorter travel time to the hospital, shorter waiting time to receive the service, fewer number of  
7  
8 days of length of stay in the hospital, low risk of death, low risk of readmission and outpatient follow-  
9  
10 up care after the emergency treatment in their local hospital.  
11  
12  
13  
14  
15  
16  
17  
18  
19  
20  
21  
22  
23  
24  
25  
26  
27  
28  
29  
30  
31  
32  
33  
34  
35  
36  
37  
38  
39  
40  
41  
42  
43  
44  
45  
46  
47  
48  
49  
50  
51  
52  
53  
54  
55  
56  
57  
58  
59  
60

For peer review only

Table 3. Regression results

| Attributes                        | MNL                 | MNL                                    | MIXL                | GMNL              |                    |                   |
|-----------------------------------|---------------------|----------------------------------------|---------------------|-------------------|--------------------|-------------------|
|                                   | (Main effects)      | (Including respondent characteristics) | (Main effects)      |                   | (Main effects)     |                   |
|                                   | Coefficients (SE)   | Coefficients (SE)                      | Coefficients (SE)   | SD (SE)           | Coefficients (SE)  | SD (SE)           |
| <b>Travel Time</b>                | -0.0086 (0.0009)*** | -0.00068 (0.0032)                      | -0.0125 (0.0020)*** | 0.0165(0.0024)*** | -0.0235 (0.0097)*  | 0.0254 (0.0091)** |
| <b>Waiting Time</b>               | -0.0056 (0.0005)*** | -0.00333(0.0015)*                      | -0.0077 (0.0008)*** | 0.0048(0.0009)*** | -0.0146 (0.0059)*  | 0.0078 (0.0028)** |
| <b>Length of Stay</b>             | -0.0768 (0.0152)*** | -0.0784(0.0153)***                     | -0.1217 (0.0262)*** | 0.1608(0.0395)*** | -0.2501 (0.1149)*  | 0.2668 (0.1264)*  |
| <b>Risk of Death</b>              | -0.3258 (0.0202)*** | -0.1953(0.0553)***                     | -0.4623 (0.0425)*** | 0.2577(0.0434)*** | -0.8409 (0.3184)** | 0.3930 (0.1478)** |
| <b>Risk of Readmission</b>        | -0.1442 (0.0159)*** | -0.0192 (0.0518)                       | -0.1803 (0.0262)*** | 0.1384(0.0386)*** | -0.3436 (0.1491)*  | 0.2210 (0.1171)   |
| <b>Outpatient Follow-Up</b>       | -0.9624 (0.0776)*** | -0.9887(0.0792)***                     | -1.2442 (0.1424)*** | 0.7290(0.1826)*** | -2.2214 (0.8883)*  | 1.5190 (0.1478)*  |
| <i>Interaction terms</i>          |                     |                                        |                     |                   |                    |                   |
| <b>Travel Time*Gender</b>         | -                   | -0.0049 (0.0019)**                     | -                   | -                 | -                  | -                 |
| <b>Waiting Time*Gender</b>        | -                   | -0.0021 (0.0009)*                      | -                   | -                 | -                  | -                 |
| <b>Waiting Time*Survey Mode</b>   | -                   | 0.0027 (0.0008)***                     | -                   | -                 | -                  | -                 |
| <b>Risk of Death*Gender</b>       | -                   | -0.1047 (0.0327)**                     | -                   | -                 | -                  | -                 |
| <b>Risk of Death*Survey Mode</b>  | -                   | 0.0862 (0.0291)**                      | -                   | -                 | -                  | -                 |
| <b>Risk of Readmission*Gender</b> | -                   | -0.0775(0.0297)**                      | -                   | -                 | -                  | --                |
| <b>Sample size (Observations)</b> | 148(2960)           | 148(2960)                              | 148(2960)           | -                 | 148 (2960)         | -                 |
| <b>Log Likelihood</b>             | -813                | -800                                   | -763                | -                 | -757               | -                 |
| <b>AIC</b>                        | 1640                | 1623                                   | 1522                | --                | 1544               | -                 |
| <b>BIC</b>                        | 1670                | 1687                                   | 1621                | -                 | 1624               | -                 |

\*\*\*p<0.001, \*\*p<0.01, \*p<0.05; SE=Standard Error, SD= Standard Deviation; AIC= Akaike information criterion; BIC = Bayesian information criterion; Survey Mode refers to paper vs web based

Table 3 also assessed the significance of attribute interactions with respondent characteristics. None of the attribute interactions with respondent age and self-reported health measures were significant which ruled out important differences in preferences of emergency healthcare because of age and health status. Only interactions (Travel Time\* Gender, Waiting Time \* Gender, Waiting Time\* Survey Mode, Risk of Death\* Gender, Risk of Death\* Survey Mode, Risk of Readmission\*Gender) were significant and these were considered in the final specification (Table 3). Results suggest that men have stronger preferences for shorter travel time (-0.0049,  $p < 0.01$ ), shorter waiting time (-0.0021,  $p < 0.05$ ), lower risk of death (-0.1047,  $P < 0.01$ ) and lower risk of readmission (-0.00775,  $P < 0.01$ ) compared to women. Respondents completing the web-based survey showed stronger preferences for less waiting time (0.0027,  $p < 0.001$ ) and lower risk of death (0.0862,  $p < 0.01$ ) compared to those completing the survey in paper. In the MIXL model, the significance of attributes remained the same as in MNL model, however, lower AIC and BIC in the MIXL indicated that it provided a better model fit compared to MNL model. Furthermore, the MIXL model identified heterogeneity among respondents (shown by the statistically significant standard deviations). This suggested that MIXL was more appropriate than the MNL model. In the GMNL model, the coefficient estimates retained the signs and significance similar to MNL and MIXL.

Table S2 (In supplementary file) reported the analysis when risk of readmission, risk of death and outpatient follow-up were treated as categorical variables as opposed to continuous variables as they were in Table 3. Categorical data were expressed as dummy variables. There was no evidence of any difference in preferences for the different levels of "length of stay" in the MNL model. Furthermore, in all three of the statistical models (MNL, MIXL, GMNL), there was no evidence that preferences for the mild of "risk of death" were any different to the reference category (low risk of death (1 in 100)) across all three models. The magnitude of the coefficients increased in line with the increase in the levels of "risk of readmission" and "outpatient follow-up", however coefficients for increasing levels of "risk of readmission" did not increase in a linear manner and there was no evidence that the mild "risk of readmission" was preferred to low risk of readmission.

## Marginal rates of substitution

1  
2 The coefficients generated from each of the different regression models in Table 3 were used to calculate the  
3  
4 marginal rates of substitution (MRS) in Table 4. The MRS in Model 1A indicated that participants were willing to  
5  
6 travel nine minutes more and willing to wait 14 minutes more for a one day reduction in length of stay in the  
7  
8 hospital. The willingness to travel increased to 38 minutes and the willingness to wait increased to 58 minutes  
9  
10 for one percent reduction in risk of death in hospital. The willingness to travel was 112 minutes and willingness  
11  
12 to wait was 172 minutes for having outpatient follow-up care after the emergency treatment at their local hospital.  
13  
14 In Model 1B the coefficients of travel time and risk of readmission used to generate the MRS were not significant,  
15  
16 therefore the marginal willingness to travel across all attributes and marginal willingness to wait derived for the  
17  
18 attribute risk of readmission were not significant. Nevertheless, the MRS estimates in all the models (except  
19  
20 Model 1B) were generally similar.  
21  
22  
23  
24  
25  
26  
27  
28  
29  
30  
31  
32  
33  
34  
35  
36  
37  
38  
39  
40  
41  
42  
43  
44  
45  
46  
47  
48  
49  
50  
51  
52  
53  
54  
55  
56  
57  
58  
59  
60

Table 4. Marginal rates of substitution in terms of willingness to travel and willingness to wait

| Attributes           | Marginal rates of substitution |          |          |          |                  |          |          |          | Condition                                                     |
|----------------------|--------------------------------|----------|----------|----------|------------------|----------|----------|----------|---------------------------------------------------------------|
|                      | MWT (in minutes)               |          |          |          | MWW (in minutes) |          |          |          |                                                               |
|                      | Model 1A                       | Model 1B | Model 1C | Model 1D | Model 1A         | Model 1B | Model 1C | Model 1D |                                                               |
| Length of stay       | 8.93                           | 115.29   | 9.74     | 10.64    | 13.71            | 23.54    | 15.81    | 17.13    | For 1 day reduction in length of stay in hospital             |
| Risk of Death        | 37.88                          | 287.21   | 36.98    | 35.78    | 58.18            | 58.65    | 60.04    | 57.6     | For 1% reduction in risk of death in hospital                 |
| Risk of Readmission  | 16.76                          | 28.24    | 14.42    | 14.62    | 25.75            | 5.77     | 23.42    | 23.53    | For 1% reduction in risk of readmission in hospital           |
| Outpatient Follow-Up | 111.90                         | 1453.97  | 99.54    | 94.53    | 171.85           | 296.91   | 161.58   | 152.2    | For having outpatient follow- up care at their local hospital |

MWT- Marginal willingness to travel; MWW- Marginal willingness to wait; Model 1A- Main effects MNL, Model 1B- With interactions MNL, Model 1C- Main effects MIXL, Model 1D- Main effects GMNL

## DISCUSSION

### Summary of the findings

This examination of public preferences demonstrated the influence of attributes on the choice of hospitals in an emergency healthcare situation. In general, participants preferred shorter travel times, shorter waiting times, fewer number of days in hospital, low risk of death, low risk of readmission and local outpatient follow-up. Gender influenced the strength of the preference, with results suggesting that men have stronger preferences for shorter travel time, shorter waiting time, lower risk of death and lower risk of readmission compared to women. However, there was no evidence of influence of other characteristics such as age, recent experience of emergency care and current health state of the individual.

The results indicate that if centralisation of emergency medical services increases travel and waiting times, but offered better care in terms of reduced risk of death, reduced length of stay, reduced risk of readmission and provisions for follow-up care in the local hospital, then participants would prefer the centralised service. Travelling 38 minutes longer by ambulance and waiting about an hour more for 1% reduction in risk of dying seems reasonable. The participants valued the opportunity for follow-up at their local hospital more than any other attributes examined in this DCE. Though traveling about 2 hours longer and waiting about 3 hours more may appear unrealistic value placed on local outpatient follow-up, these possibly reflect the feeling of emotional attachment and enormous pride of people towards their local NHS hospital.[45] However, it was also found that the centralised hospital should also not be too far away to be acceptable (not needing more than two hours of additional travel time).

### Comparison with other studies

While differences exist between studies in terms of healthcare context, design, attributes and levels used, the findings of this study are in line with other relevant DCE studies. Earlier studies attempting to quantify the strengths of individual preferences for unscheduled healthcare available during usual GP service hours have indicated that patients prefer shorter waiting times to get a decision on treatment and that services are provided closer to their homes.[20,46] Unlike our study, these studies reported age related differences in strength of preferences: younger age groups (<45 years) held strong preferences with respect to the way of making contact with the healthcare system. A study on Australian public's choice among alternatives of emergency care reported clear preferences for shorter waiting times and strong emphasis on the quality of emergency healthcare service.[47] A significant preference heterogeneity was observed in this study and the strength of the preference changed according to the presenting context and situation such as the perceived severity of illness and who was being treated, but the influence of age and gender was not reported. Another DCE study which examined the factors influencing the choice of hospitals in London patients on waiting lists of range of non-emergency situations demonstrated that individuals prefer shorter travel time to hospital, shorter waiting time to receive the service, the follow-up care at their home hospital and a high valuation of hospital reputation.[19] This study reported differences in preferences in patient related to gender and age suggesting that patients are more likely to prefer stay at their local hospitals as their age increases and males are more likely to choose to move to a non-local alternative hospital than females. Potential patients in Germany were willing to sacrifice longer travel distance and preferred location of care for a highly specialised surgical care provision with shorter waiting times,[48] but the influence of respondent age and gender was not reported.

It is not surprising that non-emergency situations show similar results. A recent study assessing preferences for centralising specialist cancer services also found that patients,

1  
2  
3 health professionals and the public all prefer shorter travel times, lower risk of death and  
4 complications, and better access to specialist centres.[49] However, there was no evidence of  
5 differences because of gender, age or place of residence of the respondents. Risk of death  
6 and risk of complications were ranked highly whereas relatively lower importance was given  
7 to travel time.  
8  
9  
10  
11  
12  
13  
14  
15  
16

### 17 **Implications of the study findings**

18  
19  
20 This study reveals preferences and the trade-offs individuals are willing to make across  
21 hospital attributes when choosing hospitals for emergency healthcare. The findings provide  
22 valuable insights for decision-makers in relation to the centralisation of emergency healthcare  
23 services. Contrary to the concerns about distance decay,[11,12] where the utilisation of  
24 healthcare services decreases with the increase in travel time to healthcare facilities, the  
25 findings suggest that whilst people may place a high value on their local hospital, in an  
26 emergency situation they may be willing to exchange increased journey time for better quality  
27 of care. This assumes that the ambulance response would be the same, and that other  
28 aspects of local services would not be affected, which may not be realistic but exploring this  
29 with the DCE would have added additional complexity that may make the tool difficult to  
30 complete. However, healthcare centralisation planners should also carefully consider how  
31 best to work with town and traffic planning services to help optimise services or at the very  
32 least ensure that other system constraints do not remove any potential benefits of  
33 centralisation. The preferences are not influenced by age, health status or previous experience  
34 of emergency medical services, suggesting that services do not necessarily have to be tailored  
35 according to age-groups or health status, at least within the range of respondents studied.  
36  
37 However, it was observed that there are gender differences in the strength of the preferences,  
38 which could possibly be related to the differences in knowledge, attitudes and previous  
39 healthcare experiences between men and women.[50] Whilst this finding may specifically  
40 reflect this cohort, it is recommended that future researchers and healthcare providers  
41  
42  
43  
44  
45  
46  
47  
48  
49  
50  
51  
52  
53  
54  
55  
56  
57  
58  
59  
60



1  
2  
3 consider any communication about centralising services should be sensitive to gender  
4 differences whilst not allowing decisions about service provision to be driven by the  
5 preferences one particular gender especially without clearly understanding why these  
6 differences exist. Overall, the DCE results support policy recommendations to centralise  
7 emergency medical care in local hospitals into fewer specialised high performing units,[3,4] as  
8 long as journey times are not excessively long and after-care can be provided locally.  
9  
10 However, our survey was framed to look at choices for emergency ambulance admissions and  
11 we caution that these findings may not reflect the preferences in “blue-light” emergencies  
12 where the patient is not in a position to make the choice of which hospital to go to.  
13  
14 Nevertheless, the preferences observed are for planning services and not for making decision  
15 about immediate care in an emergency.  
16  
17  
18  
19  
20  
21  
22  
23  
24  
25  
26  
27  
28  
29

### 30 **Strengths and limitations**

31  
32 The findings of this study should be interpreted in light of some strengths and limitations. We  
33 attempted to study a wide cross section of a local unselected population to represent the  
34 preferences of potential users for a newly built centralised emergency hospital. However, due  
35 to the contact databases which were available for us to invite participants, it only represents  
36 specific population groups registered with the Healthwatch or Northumbria Healthcare NHS  
37 Foundation Trust, and sampling bias cannot be ruled out. Whilst DCE offers several  
38 advantages over other preference elicitation methods used in healthcare, concerns have been  
39 expressed about their external validity.[51] Despite a high proportion of complete responses  
40 in the DCE, a number of participants found the choice tasks difficult to complete which could  
41 mean the attributes were not appropriate to them and the choices were arbitrarily made.  
42  
43 Furthermore, the attributes used in the DCE were taken from the literature solely and were not  
44 based on findings from qualitative research[52], nor was the choice of attributes and levels  
45 informed by any patient and public involvement (PPI). Consequently, other important attributes  
46 may have been left out. The attributes and their levels in the choice sets were framed to closely  
47  
48  
49  
50  
51  
52  
53  
54  
55  
56  
57  
58  
59  
60

1  
2  
3 represent the emergency care in NHS England. However, the way the attributes were framed  
4 could possibly have influenced the choices made by respondents,[53-55] and it is unclear  
5 whether choices would remain the same, if the attributes were framed in the other way, e.g.  
6 would preferences have been different if “risk of dying” was framed as “chance of survival”?  
7 or if “travel time” and “waiting time” were used as a single attribute of “call to treatment time”?  
8 But, merging the “travel time” and “waiting time” as a single attribute at the design stage would  
9 have reduced the explanatory power of the DCE. The presentation of attribute levels only in  
10 text formats could have created difficulties for some respondents in understanding the choice  
11 sets. Graphics and icons are often superior to text in communicating health information.[56-  
12 58] However it has been argued that within a DCE context, independent of educational level  
13 and literacy of respondents, words depicting attribute levels lead to more consistent answer  
14 patterns and more accurate attribute level interpretation and estimates.[54] One of the  
15 strengths of this survey lies in the fact that both survey modes- web based and postal (paper)  
16 were used enabling us to increase the representation of a wider cross section of population.  
17 However, experimenting with the different approaches for survey administration was beyond  
18 the scope of this study, use of different approaches might have introduced a response bias  
19 because of the systematic differences (for example proportion of older people) between the  
20 respondents in each approach. The conventional practice of a DCE assumes that respondents  
21 choose among alternatives by rationally trading-off across all attributes in their choice set.  
22 However emerging evidence suggests that some respondents’ trade-off only a subset of  
23 attributes while choosing among alternatives.[59-61] Failing to account for this phenomenon,  
24 widely referred to as attribute non-attendance, may lead to biased preference estimates.[62]  
25 A number of methods have been proposed in the literature to identify attribute non-attendance,  
26 which should be considered by future studies, such as asking respondents directly if they  
27 ignored any of the characteristics, use of econometric models such as latent class model to  
28 establish the probability of attribute non-attendance and use of eye-tracking technology.[62-  
29 64] Finally, the study may not be generalised to other settings, because pre-existing local  
30  
31  
32  
33  
34  
35  
36  
37  
38  
39  
40  
41  
42  
43  
44  
45  
46  
47  
48  
49  
50  
51  
52  
53  
54  
55  
56  
57  
58  
59  
60

1  
2  
3 influences on experiences and views will vary, such as historical service performance,  
4 demographic mix and healthcare geography.  
5  
6  
7  
8  
9

## 10 **CONCLUSION**

11  
12  
13 This study explored and quantified the strength of individual preferences relating to provision  
14 of emergency medical services. The findings highlight that respondents prefer shorter travel  
15 time, shorter waiting time, fewer number of days in hospital, low risk of death, low risk of  
16 readmission and outpatient follow-up at their local hospital. However, people are willing to  
17 trade-off increased travel time and waiting time for high quality emergency medical care in a  
18 centralised hospital, in line with policy documents recommending centralisation.[3,4]  
19  
20 Decisions to centralise emergency medical services should not only be justified on clinical  
21 grounds and cost savings, but also need to be informed by preferences of potential service  
22 users.  
23  
24  
25  
26  
27  
28  
29  
30  
31  
32  
33  
34  
35

### 36 **Figure 1. Example of choice sets used in the DCE**

#### 37 38 39 40 41 **Acknowledgement**

42 We acknowledge the support from Healthwatch Northumberland and Northumbria Health  
43 Care NHS Foundation Trust (NHCT) in conducting the survey. We thank The Health  
44 Foundation, London for funding this study as a part of improvement science doctoral fellowship  
45 funded by The Health Foundation, London. We also thank the participants of the survey.  
46  
47  
48  
49  
50  
51

#### 52 **Author contribution:**

53 NB, PM, CP and LV conceived the study. NB designed the DCE, implemented the survey,  
54 carried out the analyses and wrote the first draft of the manuscript. NB, PM, CP and LV  
55 reviewed, commented, edited the manuscript and approved the final version of the manuscript.  
56  
57  
58  
59  
60

1  
2  
3 **Funding statement:** This work was funded by The Health Foundation, London.  
4  
5

6  
7 **Competing interest statement:** No competing interest declared  
8  
9

10 **Data sharing statement:** Anonymised survey data from the study are available from the  
11 corresponding author on reasonable request.  
12  
13  
14  
15  
16  
17  
18  
19  
20  
21  
22  
23  
24  
25  
26  
27  
28  
29  
30  
31  
32  
33  
34  
35  
36  
37  
38  
39  
40  
41  
42  
43  
44  
45  
46  
47  
48  
49  
50  
51  
52  
53  
54  
55  
56  
57  
58  
59  
60

For peer review only

## References

1. NHS England. The NHS belongs to the people: A call to action. London, 2013.
2. Fahy N, McKee M, Busse R, et al. How to meet the challenge of ageing populations. *BMJ* 2011;**342**:d3815
3. NHS England. Five year forward view. London: NHS England, 2014.
4. NHS England. High quality care for all, now and for future generations: Transforming urgent and emergency care services in England- Urgent and Emergency Care Review End of Phase 1 Report. London: NHS England, 2013.
5. Hunter RM, Davie C, Rudd A, et al. Impact on Clinical and Cost Outcomes of a Centralized Approach to Acute Stroke Care in London: A Comparative Effectiveness Before and After Model. *PLoS ONE* 2013;**8**(8):e70420.
6. Eichler K, Hess S, Chmiel C, et al. Sustained health-economic effects after reorganisation of a Swiss hospital emergency centre: a cost comparison study. *Emergency Medicine Journal* 2014;**31**(10):818-23.
7. Hunter RM, Fulop NJ, Boaden RJ, et al. The potential role of cost-utility analysis in the decision to implement major system change in acute stroke services in metropolitan areas in England. *Health Research Policy and Systems* 2018;**16**(1):23.
8. Kelly C, Hulme C, Farragher T, et al. Are differences in travel time or distance to healthcare for adults in global north countries associated with an impact on health outcomes? A systematic review. *BMJ Open* 2016;**6**(11)
9. Nicholl J, West J, Goodacre S, et al. The relationship between distance to hospital and patient mortality in emergencies: an observational study. *Emergency Medicine Journal* 2007;**24**(9):665-68.

- 1  
2  
3 10. Roberts A, Blunt I, Bardsley M. Focus On: Distance from home to emergency care.  
4  
5 London: The Health Foundation and the Nuffield Trust, 2014.  
6  
7  
8  
9 11. Raknes G, Hansen E, Hunskaar S. Distance and utilisation of out-of-hours services in a  
10  
11 Norwegian urban/rural district: an ecological study. *BMC Health Services Research*  
12  
13 2013;**13**(1):222.  
14  
15  
16 12. Turnbull J, Martin D, Lattimer V, et al. Does distance matter? Geographical variation in  
17  
18 GP out-of-hours service use: an observational study. *Br J Gen Pract*  
19  
20 2008;**58**(552):471-7.  
21  
22  
23 13. Beckert W, Christensen M, Collyer K. Choice of NHS-funded Hospital Services in  
24  
25 England. *The Economic Journal* 2012;**122**(560):400-17.  
26  
27  
28 14. Ali S, Ronaldson S. Ordinal preference elicitation methods in health economics and  
29  
30 health services research: using discrete choice experiments and ranking methods.  
31  
32 *British Medical Bulletin* 2012;**103**(1):21-44.  
33  
34  
35 15. Salampessy BH, Veldwijk J, Jantine Schuit A, et al. The Predictive Value of Discrete  
36  
37 Choice Experiments in Public Health: An Exploratory Application. *Patient* 2015  
38  
39  
40 16. Ryan M, Gerard K, Amaya-Amaya M. *Using Discrete Choice Experiments to Value*  
41  
42 *Health and Health Care*: Springer, 2008.  
43  
44  
45  
46 17. Ryan M, McIntosh E, Dean T, et al. Trade-offs between location and waiting times in the  
47  
48 provision of health care: the case of elective surgery on the Isle of Wight. *J Public*  
49  
50 *Health Med* 2000;**22**(2):202-10.  
51  
52  
53 18. Shackley P, Slack R, Michaels J. Vascular patients' preferences for local treatment: an  
54  
55 application of conjoint analysis. *J Health Serv Res Policy* 2001;**6**(3):151-7.  
56  
57  
58  
59  
60

- 1  
2  
3 19. Burge P, Devlin N, Appleby J, et al. London Patient Choice Project Evaluation: A model  
4 of patients' choices of hospital from stated and revealed preference choice data:  
5  
6 RAND Europe & The King's Fund & The City University, 2005.  
7  
8  
9
- 10 20. Gerard K, Lattimer V. Preferences of patients for emergency services available during  
11 usual GP surgery hours: a discrete choice experiment. *Family Practice*  
12  
13 2005;**22**(1):28-36.  
14  
15  
16
- 17 21. Dixon A, Robertson R, Appleby J, et al. Patient Choice: How patients choose and how  
18 providers respond. London: The King's Fund, 2010.  
19  
20  
21  
22
- 23 22. Sorup C, Jacobsen P, Forberg J. Evaluation of emergency department performance - a  
24 systematic review on recommended performance and quality-in-care measures.  
25  
26 *Scandinavian Journal of Trauma, Resuscitation and Emergency Medicine*  
27  
28 2013;**21**(1):62.  
29  
30  
31
- 32 23. The College of Emergency Medicine. Emergency Department Clinical Quality Indicators:  
33 -A CEM guide to implementation. London: The College of Emergency Medicine,  
34  
35 2011.  
36  
37  
38
- 39 24. Cameron PA, Schull MJ, Cooke MW. A framework for measuring quality in the  
40 emergency department. *Emergency Medicine Journal* 2011;**28**(9):735-40.  
41  
42  
43  
44
- 45 25. Acute surveys co-ordination centre for the NHS patient survey programme. The key  
46 findings report for the 2008 emergency department survey: Picker Institute Europe,  
47  
48 2009.  
49  
50  
51
- 52 26. Rose JM, Bliemer MCJ. Constructing Efficient Stated Choice Experimental Designs.  
53  
54 *Transport Reviews* 2009;**29**(5):587-617.  
55  
56
- 57 27. Lancsar E, Louviere J. Conducting discrete choice experiments to inform healthcare  
58 decision making: a user's guide. *Pharmacoeconomics* 2008;**26**(8):661-77.  
59  
60

- 1  
2  
3 28. Rose JM, Bliemer MCJ, Hensher DA, et al. Designing efficient stated choice experiments  
4 in the presence of reference alternatives. *Transportation Research Part B:*  
5 *Methodological* 2008;**42**(4):395-406.  
6  
7  
8  
9  
10 29. Lancsar E, Louviere J. Deleting 'irrational' responses from discrete choice experiments: a  
11 case of investigating or imposing preferences? *Health Econ* 2006;**15**(8):797-811.  
12  
13  
14  
15 30. Ozdemir S, Mohamed AF, Johnson FR, et al. Who pays attention in stated-choice  
16 surveys? *Health Econ* 2010;**19**(1):111-8.  
17  
18  
19  
20 31. ChoiceMetrics. Ngene 1.1.1 User Manual & Reference Guide. Australia, 2012.  
21  
22  
23  
24 32. de Bekker-Grob EW, Donkers B, Jonker MF, et al. Sample Size Requirements for  
25 Discrete-Choice Experiments in Healthcare: a Practical Guide. *Patient* 2015  
26  
27  
28  
29 33. Orme B. Sample size issues for conjoint analysis studies. Sawtooth Software Research  
30 Paper Series, 1998.  
31  
32  
33  
34 34. Orme B. Sample Size Issues for Conjoint Analysis Studies. Sawtooth Software Technical  
35 Paper. Sequim, 2010.  
36  
37  
38  
39 35. Lancaster KJ. A New Approach to Consumer Theory. *Journal of Political Economy*  
40 1966;**74**(2):132-57.  
41  
42  
43  
44 36. San Miguel F, Ryan M, Amaya-Amaya M. 'Irrational' stated preferences: a quantitative  
45 and qualitative investigation. *Health Economics* 2005;**14**(3):307-22.  
46  
47  
48  
49 37. Ryan M, Watson V, Entwistle V. Rationalising the 'irrational': a think aloud study of  
50 discrete choice experiment responses. *Health Economics* 2009;**18**(3):321-36.  
51  
52  
53  
54 38. de Bekker-Grob EW, Ryan M, Gerard K. Discrete choice experiments in health  
55 economics: a review of the literature. *Health Economics* 2012;**21**(2):145-72.  
56  
57  
58  
59  
60



- 1  
2  
3 39. Hensher DA, Greene WH. The Mixed Logit model: The state of practice. *Transportation*  
4  
5 2003;**30**(2):133-76.  
6  
7  
8 40. Hess S, Train K. Correlation and Scale in Mixed Logit Models. *Journal of Choice*  
9  
10 *Modelling* 2017;**23**:1-8.  
11  
12  
13 41. Fiebig DG, Keane MP, Louviere J, et al. The Generalized Multinomial Logit Model:  
14  
15 Accounting for Scale and Coefficient Heterogeneity. *Marketing Science*  
16  
17 2010;**29**(3):393-421.  
18  
19  
20 42. Hauber AB, Gonzalez JM, Groothuis-Oudshoorn CG, et al. Statistical Methods for the  
21  
22 Analysis of Discrete Choice Experiments: A Report of the ISPOR Conjoint Analysis  
23  
24 Good Research Practices Task Force. *Value Health* 2016;**19**(4):300-15.  
25  
26  
27 43. R Core Team. R: A language and environment for statistical computing. R Foundation for  
28  
29 Statistical Computing, Vienna, Austria., 2016.  
30  
31  
32 44. Janssen B, Szende A. Population Norms for the EQ-5D. In: Szende A, Janssen B,  
33  
34 Cabases J, eds. Self-Reported Population Health: An International Perspective  
35  
36 based on EQ-5D. Dordrecht: Springer Netherlands, 2014:19-30.  
37  
38  
39 45. Thomson M, MacInnis DJ, Whan Park C. The Ties That Bind: Measuring the Strength of  
40  
41 Consumers' Emotional Attachments to Brands. *Journal of Consumer Psychology*  
42  
43 2005;**15**(1):77-91.  
44  
45  
46 46. Gerard K, Lattimer V, Turnbull J, et al. Reviewing emergency care systems 2: measuring  
47  
48 patient preferences using a discrete choice experiment. *Emergency Medicine Journal*  
49  
50 2004;**21**(6):692-97.  
51  
52  
53 47. Harris P, Whitty JA, Kendall E, et al. The Australian public's preferences for emergency  
54  
55 care alternatives and the influence of the presenting context: a discrete choice  
56  
57 experiment. *BMJ Open* 2015;**5**(4)  
58  
59  
60

- 1  
2  
3 48. Schwappach DL, Strasmann TJ. Does location matter? A study of the public's  
4 preferences for surgical care provision. *J Eval Clin Pract* 2007;**13**(2):259-64.  
5  
6  
7  
8 49. Vallejo-Torres L, Melnychuk M, Vindrola-Padros C, et al. Discrete-choice experiment to  
9 analyse preferences for centralizing specialist cancer surgery services. *Br J Surg*  
10 2018;**105**(5):587-96.  
11  
12  
13  
14  
15 50. Wessels H, de Graeff A, Wynia K, et al. Gender-Related Needs and Preferences in  
16 Cancer Care Indicate the Need for an Individualized Approach to Cancer Patients.  
17 *The Oncologist* 2010;**15**(6):648-55.  
18  
19  
20  
21  
22 51. Quaife M, Terris-Prestholt F, Di Tanna GL, et al. How well do discrete choice  
23 experiments predict health choices? A systematic review and meta-analysis of  
24 external validity. *The European Journal of Health Economics* 2018  
25  
26  
27  
28  
29 52. Vass C, Rigby D, Payne K. The Role of Qualitative Research Methods in Discrete  
30 Choice Experiments. *Med Decis Making* 2017;**37**(3):298-313.  
31  
32  
33  
34  
35 53. Kragt M, Bennett J. Attribute Framing in Choice Experiments: How Do Attribute Level  
36 Descriptions Affect Value Estimates? *Environmental and Resource Economics*  
37 2012;**51**(1):43-59.  
38  
39  
40  
41  
42 54. Veldwijk J, Lambooi MS, van Til JA, et al. Words or graphics to present a Discrete  
43 Choice Experiment: Does it matter? *Patient Educ Couns* 2015;**98**(11):1376-84.  
44  
45  
46  
47  
48 55. Veldwijk J, Essers BAB, Lambooi MS, et al. Survival or Mortality: Does Risk Attribute  
49 Framing Influence Decision-Making Behavior in a Discrete Choice Experiment?  
50 *Value in Health* 2016;**19**(2):202-09.  
51  
52  
53  
54  
55 56. Tait AR, Voepel-Lewis T, Zikmund-Fisher BJ, et al. Presenting research risks and  
56 benefits to parents: does format matter? *Anesth Analg* 2010;**111**(3):718-23.  
57  
58  
59  
60

- 1  
2  
3 57. Tait AR, Voepel-Lewis T, Zikmund-Fisher BJ, et al. The effect of format on parents'  
4 understanding of the risks and benefits of clinical research: a comparison between  
5 text, tables, and graphics. *J Health Commun* 2010;**15**(5):487-501.  
6  
7  
8  
9  
10 58. McCaffery KJ, Dixon A, Hayen A, et al. The influence of graphic display format on the  
11 interpretations of quantitative risk information among adults with lower education and  
12 literacy: a randomized experimental study. *Med Decis Making* 2012;**32**(4):532-44.  
13  
14  
15  
16  
17 59. Hensher DA, Rose J, Greene WH. The implications on willingness to pay of respondents  
18 ignoring specific attributes. *Transportation* 2005;**32**(3):203-22.  
19  
20  
21  
22  
23 60. Carlsson F, Kataria M, Lampi E. Dealing with Ignored Attributes in Choice Experiments  
24 on Valuation of Sweden's Environmental Quality Objectives. *Environmental and*  
25 *Resource Economics* 2010;**47**(1):65-89.  
26  
27  
28  
29  
30 61. Colombo S, Christie M, Hanley N. What are the consequences of ignoring attributes in  
31 choice experiments? Implications for ecosystem service valuation. *Ecological*  
32 *Economics* 2013;**96**:25-35.  
33  
34  
35  
36  
37 62. Hensher DA, Greene WH. Non-attendance and dual processing of common-metric  
38 attributes in choice analysis: a latent class specification. *Empirical Economics*  
39 2010;**39**(2):413-26.  
40  
41  
42  
43  
44 63. Hole AR, Kolstad JR, Gyrd-Hansen D. Inferred vs. stated attribute non-attendance in  
45 choice experiments: A study of doctors' prescription behaviour. *Journal of Economic*  
46 *Behavior & Organization* 2013;**96**:21-31.  
47  
48  
49  
50  
51  
52 64. Spinks J, Mortimer D. Lost in the crowd? Using eye-tracking to investigate the effect of  
53 complexity on attribute non-attendance in discrete choice experiments. *BMC Med*  
54 *Inform Decis Mak* 2016;**16**:14.  
55  
56  
57  
58  
59  
60

1  
2  
3  
4  
5  
6  
7  
8  
9  
10  
11  
12  
13  
14  
15  
16  
17  
18  
19  
20  
21  
22  
23  
24  
25  
26  
27  
28  
29  
30  
31  
32  
33  
34  
35  
36  
37  
38  
39  
40  
41  
42  
43  
44  
45  
46  
47  
48  
49  
50  
51  
52  
53  
54  
55  
56  
57  
58  
59  
60

Suppose you have an emergency healthcare need which required calling an ambulance. Below are two hospitals, hospital A and hospital B, each with different characteristics. If you have a choice, which hospital would you choose from below?

| Characteristics                                                                              | Hospital A                                                                | Hospital B                      |
|----------------------------------------------------------------------------------------------|---------------------------------------------------------------------------|---------------------------------|
| Travel time to hospital                                                                      | 1 and half hours                                                          | 1 hour                          |
| Waiting time in the A&E department to be seen by a doctor or nurse who can provide treatment | 4 hours or more                                                           | Less than 30 minutes            |
| Length of stay at the hospital before going home                                             | 3 days                                                                    | 5 days                          |
| Risk of dying from the illness (...patients die)                                             | Moderate<br>(5 in 100 patients)                                           | Mild<br>(3 in 100 patients)     |
| Risk of being re-admitted to the hospital after going home                                   | Mild<br>(3 in 100 patients)                                               | Moderate<br>(5 in 100 patients) |
| Outpatient care after emergency treatment                                                    | At a hospital which about an extra 1 hour travel time from local hospital | Local hospital                  |
| Which hospital would you chose to go in emergency? (Please tick only one box at the right)   | <input type="checkbox"/>                                                  | <input type="checkbox"/>        |

210x297mm (300 x 300 DPI)

### Transitivity and Monotonicity

Transitivity implies if A is preferred to B and B is preferred to C, then A should be preferred to C.[1] In each of the blocks of questionnaire, choice set number 3 with alternatives as hospital A and hospital B (i.e. from the choice design) was taken as a base for the transitivity test. The questions used for the transitivity test were spread out evenly as possible across the choice task. Therefore, another choice set number 6 was manually added (to the choice design) keeping hospital B attribute levels the same as in the choice set 3 but with a new alternative, hospital C with completely different attribute levels. Another additional choice set number 9 was manually added taking characteristics of hospital A from the choice set 3 and characteristics of hospital C from choice set 6. In short, the transitivity test was structured as follows:

Choice set number 3: Hospital A=A, Hospital B=B

Choice set number 6: Hospital A=B, Hospital B=C

Choice set number 9: Hospital A=A, Hospital B=C

However, in the questionnaire in each of the choice sets the alternatives were named as hospital A and hospital B. So, if the respondent made choices in a cyclic order (prefer A to B and prefer B to C and prefer C to A; prefer B to A, C to B, and then prefer A to C), the choice was considered intransitive and thus irrational.

Though not essential for rationality, monotonicity, is a desirable axiom of consumer theory and implies that more is preferred to less.[2] Therefore, another choice set number 12 where one hospital alternative was obviously dominant in terms of all attributes was manually added (to the choice design). It was assumed that individuals preferred the alternative with shorter travel time, shorter waiting time, low risk of mortality, low risk of readmission, shorter length of stay and outpatient follow-up at their local hospital. Any violation of monotonicity axiom in the respondent choices was considered irrational.

## Reference:

1. Ozdemir S, Mohamed AF, Johnson FR, et al. Who pays attention in stated-choice surveys? Health economics 2010;19:111-8.
2. Lancsar E, Louviere J. Deleting 'irrational' responses from discrete choice experiments: a case of investigating or imposing preferences? Health economics 2006;15:797-811.

**Table S1: Regression results from the pilot study**

| Attributes           | Coefficients (SE) (Main effects-MNL) |
|----------------------|--------------------------------------|
| Travel time          | -0.01 (0.003)***                     |
| Waiting time         | -0.007 (0.0013)***                   |
| Length of stay       | -0.10 (0.04)*                        |
| Risk of death        | -0.28 (0.05)***                      |
| Risk of readmission  | -0.16 (0.04)***                      |
| Outpatient follow-up | -0.62 (0.17)***                      |

\*\*\*p<0.001, \*p<0.05; SE=Standard Error,

Table S2. Regression results after recoding selected variables as categorical

| Attributes                        | MNL                 | MIXL                | GMNL               |                     |                    |
|-----------------------------------|---------------------|---------------------|--------------------|---------------------|--------------------|
|                                   | (Main effects)      |                     | (Main effects)     |                     |                    |
|                                   | Coefficients (SE)   | Coefficients (SE)   | SD (SE)            | Coefficients (SE)   | SD (SE)            |
| <b>Travel Time</b>                | -0.0065 (0.0009)*** | -0.0094 (0.0020)*** | 0.0160 (0.0026)*** | -0.0105 (0.0022)*** | 0.0165(0.0026)***  |
| <b>Waiting Time</b>               | -0.0039 (0.0007)*** | -0.0051 (0.0010)*** | 0.0046 (0.0010)*** | -0.006 (0.0013)***  | 0.0049 (0.0010)*** |
| <b>Length of Stay</b>             | -0.0277 (0.0168)    | -0.0608 (0.0265)*   | 0.1459 (0.0429)*** | -0.0744 (0.0302)*   | 0.1541 (0.0419)*** |
| <b>Risk of Death</b>              |                     |                     |                    |                     |                    |
| (Base level: Low (1 in 100))      |                     |                     |                    |                     |                    |
| Mild (3 in 100)                   | -0.6103 (0.319)     | -0.3169 (0.4903)    | 0.2563 (0.6952)    | -0.6024 (0.5483)    | 0.2919 (0.3664)    |
| Moderate (5 in 100)               | -1.8155 (0.288)***  | -2.0607 (0.4388)*** | 0.3318 (0.5390)    | -2.4479 (0.5104)*** | 0.0473 (0.4896)    |
| High (7 in 100)                   | -1.5249 (0.161)***  | -2.1425 (0.2830)*** | 1.3199 (0.2785)*** | -2.4847 (0.3624)*** | 1.3312 (0.2726)*** |
| <b>Risk of Readmission</b>        |                     |                     |                    |                     |                    |
| (Base level: Low (1 in 100))      |                     |                     |                    |                     |                    |
| Mild (3 in 100)                   | 0.3326 (0.1296)*    | 0.3297 (0.1864)     | 0.3266 (0.6027)    | 0.4436 (0.2119)*    | 0.5174 (0.2913)    |
| Moderate (5 in 100)^              | -                   | -                   | -                  | -                   | -                  |
| High (7 in 100)                   | -0.7728 (0.1219)*** | -0.9753 (0.1986)*** | 0.7813 (0.2846)**  | -1.1345 (0.2297)*** | 0.8667 (0.2689)*** |
| <b>Outpatient Follow-Up</b>       |                     |                     |                    |                     |                    |
| (Base level: Local hospital)      |                     |                     |                    |                     |                    |
| Distant hospital                  | -0.8455 (0.1027)*** | -1.0647 (0.1808)*** | 0.9440 (0.1821)*** | -1.2177 (0.2222)*** | 1.0642 (0.1940)*** |
| <b>Sample size (Observations)</b> | 148(2960)           | 148(2960)           | -                  | 148 (2960)          | -                  |
| <b>Log Likelihood</b>             | -796                | -751                | -                  | -747                | -                  |
| <b>AIC</b>                        | 1612                | 1539                | -                  | 1533                | -                  |
| <b>BIC</b>                        | 1680                | 1640                | -                  | 1647                | -                  |

\*\*\*p<0.001, \*\*p<0.01, \*p<0.05; SE=Standard Error, SD= Standard Deviation; AIC= Akaike information criterion; BIC = Bayesian information criterion, ^ could not be estimated because of collinearity issues

1  
2  
3  
4  
5  
6  
7  
8  
9  
10  
11  
12  
13  
14  
15  
16  
17  
18  
19  
20  
21  
22  
23  
24  
25  
26  
27  
28  
29  
30  
31  
32  
33  
34  
35  
36  
37  
38  
39  
40  
41  
42  
43  
44  
45  
46  
47  
48  
49  
50  
51  
52  
53  
54  
55  
56  
57  
58  
59  
60

# Survey on Hospital Preferences

(Block-1)

For peer review only



1  
2  
3  
4  
5 This survey is being carried out by a researcher in health economics at the Institute of  
6  
7 Health & Society, Newcastle University. We would like to know what is important to  
8  
9 you when thinking about hospitals which provide accident and emergency care. To do  
10  
11 this we will ask you to **make a series of choices between two hospitals** which do  
12  
13 not exist, but this will allow us to understand what people think is important when  
14  
15 designing emergency services. We would like to know which hospital you personally  
16  
17 would prefer to go to if you were suddenly unwell and had called 999, and whether  
18  
19 your view would change if the hospitals performed differently e.g. reduced or increased  
20  
21 waiting times or survival rates. We have not suggested a reason why you would be  
22  
23 unwell, but it is not a painful condition. You would require treatment on the same day  
24  
25 to feel better and this can only be given in hospital.  
26  
27  
28

29  
30 The answers you provide here will only be used for research purposes and will not  
31  
32 directly affect the healthcare that you need. There are no right or wrong choices, we  
33  
34 are just interested in knowing your views. **You cannot be identified from your**  
35  
36 **answers.** Please do not write anything which might give away your identity.  
37  
38  
39

40 The hospitals **differ** in terms of the following ways:  
41  
42

- 43 1) **Travel time to the hospital:** This is the time it takes you to reach the hospital  
44  
45 by ambulance.  
46  
47
- 48 2) **Waiting time in the A&E department to be seen by a doctor or nurse who**  
49  
50 **can provide treatment:** This is the time you need to wait at the A&E to be given  
51  
52 specific treatment for your problem by a doctor or nurse.  
53  
54
- 55 3) **Length of stay at the hospital before going home:** This is the number of  
56  
57 days you need to stay in this hospital.  
58  
59  
60

- 1  
2  
3  
4  
5  
6  
7  
8  
9  
10  
11  
12  
13  
14  
15  
16  
17
- 4) **Risk of dying from the illness:** This is a comparison of the average number of persons dying because of this illness after attending hospital.
- 5) **Risk of being re-admitted to the hospital after going home:** This is the likelihood of being re-admitted to the hospital after you are discharged.
- 6) **Outpatient care after emergency treatment:** This is the hospital you need to go for outpatient care after discharge following your emergency treatment.

18  
19  
20

**All other aspects of the two hospitals are the same.**

21  
22  
23

Example of the task (*Please do not fill this one*)

24  
25  
26  
27  
28  
29

Imagine you have an emergency healthcare need which requires calling an ambulance. Below are two hospitals, Hospital A and Hospital B, each with different characteristics. If you have a choice, which hospital would you choose from below?

30  
31  
32  
33  
34  
35  
36  
37  
38  
39  
40  
41  
42  
43  
44  
45  
46  
47  
48  
49  
50  
51  
52  
53  
54  
55  
56  
57  
58  
59  
60

|                                                                                                         | Hospital A                                                                        | Hospital B                   |
|---------------------------------------------------------------------------------------------------------|-----------------------------------------------------------------------------------|------------------------------|
| <b>Travel time to hospital</b>                                                                          | 1 and half hours                                                                  | 1 hour                       |
| <b>Waiting time in the A&amp;E department to be seen by a doctor or nurse who can provide treatment</b> | 4 hours or more                                                                   | Less than 30 minutes         |
| <b>Length of stay at the hospital before going home</b>                                                 | 3 days                                                                            | 5 days                       |
| <b>Risk of dying from the illness</b>                                                                   | Moderate (5 in 100 patients)                                                      | Mild (3 in 100 patients)     |
| <b>Risk of being re-admitted to the hospital after going home</b>                                       | Mild (3 in 100 patients)                                                          | Moderate (5 in 100 patients) |
| <b>Outpatient care after emergency treatment</b>                                                        | At a hospital which is about an extra 1 hour travel time from your local hospital | At your local hospital       |
| <b>Which hospital would you choose to go in an emergency? (Please tick one box)</b>                     | <input type="checkbox"/>                                                          | <input type="checkbox"/>     |

1  
2  
3 In this example,  
4

- 5 ➤ It takes 1 and half hours to reach hospital A and takes 1 hour to reach hospital  
6  
7 B.  
8  
9 ➤ You need to wait 4 hours or more in the A&E to be treated in hospital A, but  
10  
11 less than 30 minutes hospital B.  
12  
13 ➤ The length of stay in Hospital A is 3 days whereas it is 5 days in Hospital B.  
14  
15 ➤ Patient has moderate risks of death in Hospital A but has mild risks in Hospital  
16  
17 B.  
18  
19 ➤ The risk of being re-admitted is mild for Hospital A and is moderate for Hospital  
20  
21 B.  
22  
23 ➤ Outpatient care, after emergency treatment, at hospital B is provided at local  
24  
25 hospital and at hospital A is provided at a hospital which is about 1 hour travel  
26  
27 time away from the local hospital.  
28  
29

30  
31 Here if hospital B is chosen, the box in the Hospital B column is marked with a  
32  
33 ✓ in the box. Or if hospital A is chosen, the box in the Hospital A column is  
34  
35 marked with ✓.  
36  
37

38  
39  
40 **In addition, we will ask you few other questions about you, but remain assured**  
41  
42 **that no questions will identify who you are.**  
43  
44

45 It takes about 15 minutes to complete the survey. Your participation in this survey is  
46  
47 voluntary and you can stop at any time without providing any reason. If you do  
48  
49 complete the survey it is not possible to remove your answers later. We cannot identify  
50  
51 them, but nobody else will know your answers either. Should you have any queries  
52  
53 regarding the survey you can contact the researcher on this telephone 01912087821,  
54  
55 or email: [nawaraj.bhattarai@ncl.ac.uk](mailto:nawaraj.bhattarai@ncl.ac.uk) .  
56  
57  
58  
59  
60

If you agree to take part in this survey, then please choose which emergency hospital you would like to go to in the following situations. **Please note that in each of the situations the characteristics of hospitals change.**

For each situation please indicate which hospital you prefer by putting a tick (✓) in the appropriate box.

### Scenario 1

Imagine you have an emergency healthcare need which requires calling an ambulance. Below are two hospitals, hospital A and hospital B, each with different characteristics. If you have a choice, which hospital would you choose from below?

|                                                                                                         | Hospital A               | Hospital B                                                                        |
|---------------------------------------------------------------------------------------------------------|--------------------------|-----------------------------------------------------------------------------------|
| <b>Travel time to hospital</b>                                                                          | 1 hour                   | 1 and half hours                                                                  |
| <b>Waiting time in the A&amp;E department to be seen by a doctor or nurse who can provide treatment</b> | 2 and half hours         | 1 hour                                                                            |
| <b>Length of stay at the hospital before going home</b>                                                 | 3 days                   | 5 days                                                                            |
| <b>Risk of dying from the illness</b>                                                                   | Mild (3 in 100 patients) | Moderate (5 in 100 patients)                                                      |
| <b>Risk of being re-admitted to the hospital after going home</b>                                       | Mild (3 in 100 patients) | Moderate (5 in 100 patients)                                                      |
| <b>Outpatient care after emergency treatment</b>                                                        | At your local hospital   | At a hospital which is about an extra 1 hour travel time from your local hospital |
| <b>Which hospital would you choose to go in an emergency? (Please tick one box)</b>                     | <input type="checkbox"/> | <input type="checkbox"/>                                                          |

## Scenario 2

Imagine you have an emergency healthcare need which requires calling an ambulance. Below are two hospitals, hospital A and hospital B, each with different characteristics. If you have a choice, which hospital would you choose from below?

|                                                                                                         | Hospital A                                                                        | Hospital B               |
|---------------------------------------------------------------------------------------------------------|-----------------------------------------------------------------------------------|--------------------------|
| <b>Travel time to hospital</b>                                                                          | 1 hour                                                                            | 1 and half hours         |
| <b>Waiting time in the A&amp;E department to be seen by a doctor or nurse who can provide treatment</b> | 1 hour                                                                            | 2 and half hours         |
| <b>Length of stay at the hospital before going home</b>                                                 | 5 days                                                                            | 3 days                   |
| <b>Risk of dying from the illness</b>                                                                   | High (7 in 100 patients)                                                          | Mild (3 in 100 patients) |
| <b>Risk of being re-admitted to the hospital after going home</b>                                       | Moderate (5 in 100 patients)                                                      | Mild (3 in 100 patients) |
| <b>Outpatient care after emergency treatment</b>                                                        | At a hospital which is about an extra 1 hour travel time from your local hospital | At your local hospital   |
| <b>Which hospital would you choose to go in an emergency? (Please tick one box)</b>                     | <input type="checkbox"/>                                                          | <input type="checkbox"/> |

## Scenario 3

Imagine you have an emergency healthcare need which requires calling an ambulance. Below are two hospitals, hospital A and hospital B, each with different characteristics. If you have a choice, which hospital would you choose from below?

|                                                                                                         | Hospital A               | Hospital B                                                                     |
|---------------------------------------------------------------------------------------------------------|--------------------------|--------------------------------------------------------------------------------|
| <b>Travel time to hospital</b>                                                                          | 2 hours or more          | Less than 30 minutes                                                           |
| <b>Waiting time in the A&amp;E department to be seen by a doctor or nurse who can provide treatment</b> | 4 hours or more          | 1 hour                                                                         |
| <b>Length of stay at the hospital before going home</b>                                                 | 1 day or less            | 6 days or more                                                                 |
| <b>Risk of dying from the illness</b>                                                                   | Low (1 in 100 patients)  | High (7 in 100 patients)                                                       |
| <b>Risk of being re-admitted to the hospital after going home</b>                                       | High (7 in 100 patients) | Low (1 in 100 patients)                                                        |
| <b>Outpatient care after emergency treatment</b>                                                        | At your local hospital   | At a hospital which about an extra 1 hour travel time from your local hospital |
| <b>Which hospital would you choose to go in an emergency? (Please tick one box)</b>                     | <input type="checkbox"/> | <input type="checkbox"/>                                                       |

## Scenario 4

Imagine you have an emergency healthcare need which requires calling an ambulance. Below are two hospitals, hospital A and hospital B, each with different characteristics. If you have a choice, which hospital would you choose from below?

|                                                                                                         | Hospital A                   | Hospital B                                                                        |
|---------------------------------------------------------------------------------------------------------|------------------------------|-----------------------------------------------------------------------------------|
| <b>Travel time to hospital</b>                                                                          | 1 hour                       | 1 and half hours                                                                  |
| <b>Waiting time in the A&amp;E department to be seen by a doctor or nurse who can provide treatment</b> | 4 hours or more              | Less than 30 minutes                                                              |
| <b>Length of stay at the hospital before going home</b>                                                 | 5 days                       | 3 days                                                                            |
| <b>Risk of dying from the illness</b>                                                                   | Moderate (5 in 100 patients) | Mild (3 in 100 patients)                                                          |
| <b>Risk of being re-admitted to the hospital after going home</b>                                       | Moderate (5 in 100 patients) | Mild (3 in 100 patients)                                                          |
| <b>Outpatient care after emergency treatment</b>                                                        | At your local hospital       | At a hospital which is about an extra 1 hour travel time from your local hospital |
| <b>Which hospital would you choose to go in an emergency? (Please tick one box)</b>                     | <input type="checkbox"/>     | <input type="checkbox"/>                                                          |

## Scenario 5

Imagine you have an emergency healthcare need which requires calling an ambulance. Below are two hospitals, hospital A and hospital B, each with different characteristics. If you have a choice, which hospital would you choose from below?

|                                                                                                         | Hospital A                                                                        | Hospital B                   |
|---------------------------------------------------------------------------------------------------------|-----------------------------------------------------------------------------------|------------------------------|
| <b>Travel time to hospital</b>                                                                          | 1 and half hours                                                                  | 1 hour                       |
| <b>Waiting time in the A&amp;E department to be seen by a doctor or nurse who can provide treatment</b> | 2 and half hours                                                                  | 1 hour                       |
| <b>Length of stay at the hospital before going home</b>                                                 | 3 days                                                                            | 5 days                       |
| <b>Risk of dying from the illness</b>                                                                   | Moderate (5 in 100 patients)                                                      | Mild (3 in 100 patients)     |
| <b>Risk of being re-admitted to the hospital after going home</b>                                       | Mild (3 in 100 patients)                                                          | Moderate (5 in 100 patients) |
| <b>Outpatient care after emergency treatment</b>                                                        | At a hospital which is about an extra 1 hour travel time from your local hospital | At your local hospital       |
| <b>Which hospital would you choose to go in an emergency? (Please tick one box)</b>                     | <input type="checkbox"/>                                                          | <input type="checkbox"/>     |



## Scenario 6

Imagine you have an emergency healthcare need which requires calling an ambulance. Below are two hospitals, hospital A and hospital B, each with different characteristics. If you have a choice, which hospital would you choose from below?

|                                                                                                         | Hospital A                                                                        | Hospital B               |
|---------------------------------------------------------------------------------------------------------|-----------------------------------------------------------------------------------|--------------------------|
| <b>Travel time to hospital</b>                                                                          | Less than 30 minutes                                                              | 1 and half hours         |
| <b>Waiting time in the A&amp;E department to be seen by a doctor or nurse who can provide treatment</b> | 1 hour                                                                            | 2 and half hours         |
| <b>Length of stay at the hospital before going home</b>                                                 | 6 days or more                                                                    | 3 days                   |
| <b>Risk of dying from the illness</b>                                                                   | High (7 in 100 patients)                                                          | Mild (3 in 100 patients) |
| <b>Risk of being re-admitted to the hospital after going home</b>                                       | Low (1 in 100 patients)                                                           | Mild (3 in 100 patients) |
| <b>Outpatient care after emergency treatment</b>                                                        | At a hospital which is about an extra 1 hour travel time from your local hospital | At your local hospital   |
| <b>Which hospital would you choose to go in an emergency? (Please tick one box)</b>                     | <input type="checkbox"/>                                                          | <input type="checkbox"/> |

## Scenario 7

Imagine you have an emergency healthcare need which requires calling an ambulance. Below are two hospitals, hospital A and hospital B, each with different characteristics. If you have a choice, which hospital would you choose from below?

|                                                                                                         | Hospital A                                                                        | Hospital B               |
|---------------------------------------------------------------------------------------------------------|-----------------------------------------------------------------------------------|--------------------------|
| <b>Travel time to hospital</b>                                                                          | 2 hours or more                                                                   | Less than 30 minutes     |
| <b>Waiting time in the A&amp;E department to be seen by a doctor or nurse who can provide treatment</b> | Less than 30 minutes                                                              | 4 hours or more          |
| <b>Length of stay at the hospital before going home</b>                                                 | 6 days or more                                                                    | 1 day or less            |
| <b>Risk of dying from the illness</b>                                                                   | Moderate (5 in 100 patients)                                                      | Mild (3 in 100 patients) |
| <b>Risk of being re-admitted to the hospital after going home</b>                                       | Low (1 in 100 patients)                                                           | High (7 in 100 patients) |
| <b>Outpatient care after emergency treatment</b>                                                        | At a hospital which is about an extra 1 hour travel time from your local hospital | At your local hospital   |
| <b>Which hospital would you choose to go in an emergency? (Please tick one box)</b>                     | <input type="checkbox"/>                                                          | <input type="checkbox"/> |

## Scenario 8

Imagine you have an emergency healthcare need which requires calling an ambulance. Below are two hospitals, hospital A and hospital B, each with different characteristics. If you have a choice, which hospital would you choose from below?

|                                                                                                         | Hospital A               | Hospital B                                                                        |
|---------------------------------------------------------------------------------------------------------|--------------------------|-----------------------------------------------------------------------------------|
| <b>Travel time to hospital</b>                                                                          | 1 and half hours         | 1 hour                                                                            |
| <b>Waiting time in the A&amp;E department to be seen by a doctor or nurse who can provide treatment</b> | 1 hour                   | 2 and half hours                                                                  |
| <b>Length of stay at the hospital before going home</b>                                                 | 3 days                   | 5 days                                                                            |
| <b>Risk of dying from the illness</b>                                                                   | Mild (3 in 100 patients) | Moderate (5 in 100 patients)                                                      |
| <b>Risk of being re-admitted to the hospital after going home</b>                                       | Mild (3 in 100 patients) | Moderate (5 in 100 patients)                                                      |
| <b>Outpatient care after emergency treatment</b>                                                        | At your local hospital   | At a hospital which is about an extra 1 hour travel time from your local hospital |
| <b>Which hospital would you choose to go in an emergency? (Please tick one box)</b>                     | <input type="checkbox"/> | <input type="checkbox"/>                                                          |

## Scenario 9

Imagine you have an emergency healthcare need which requires calling an ambulance. Below are two hospitals, hospital A and hospital B, each with different characteristics. If you have a choice, which hospital would you choose from below?

|                                                                                                         | Hospital A               | Hospital B               |
|---------------------------------------------------------------------------------------------------------|--------------------------|--------------------------|
| <b>Travel time to hospital</b>                                                                          | 2 hours or more          | 1 and half hours         |
| <b>Waiting time in the A&amp;E department to be seen by a doctor or nurse who can provide treatment</b> | 4 hours or more          | 2 and half hours         |
| <b>Length of stay at the hospital before going home</b>                                                 | 1 day or less            | 3 days                   |
| <b>Risk of dying from the illness</b>                                                                   | Low (1 in 100 patients)  | Mild (3 in 100 patients) |
| <b>Risk of being re-admitted to the hospital after going home</b>                                       | High (7 in 100 patients) | Mild (3 in 100 patients) |
| <b>Outpatient care after emergency treatment</b>                                                        | At your local hospital   | At your local hospital   |
| <b>Which hospital would you choose to go in an emergency? (Please tick one box)</b>                     | <input type="checkbox"/> | <input type="checkbox"/> |

## Scenario 10

Imagine you have an emergency healthcare need which requires calling an ambulance. Below are two hospitals, hospital A and hospital B, each with different characteristics. If you have a choice, which hospital would you choose from below?

|                                                                                                         | Hospital A                                                                        | Hospital B               |
|---------------------------------------------------------------------------------------------------------|-----------------------------------------------------------------------------------|--------------------------|
| <b>Travel time to hospital</b>                                                                          | Less than 30 minutes                                                              | 2 hours or more          |
| <b>Waiting time in the A&amp;E department to be seen by a doctor or nurse who can provide treatment</b> | 1 hour                                                                            | 2 and half hours         |
| <b>Length of stay at the hospital before going home</b>                                                 | 1 day or less                                                                     | 6 days or more           |
| <b>Risk of dying from the illness</b>                                                                   | High (7 in 100 patients)                                                          | Low (1 in 100 patients)  |
| <b>Risk of being re-admitted to the hospital after going home</b>                                       | Low (1 in 100 patients)                                                           | High (7 in 100 patients) |
| <b>Outpatient care after emergency treatment</b>                                                        | At a hospital which is about an extra 1 hour travel time from your local hospital | At your local hospital   |
| <b>Which hospital would you choose to go in an emergency? (Please tick one box)</b>                     | <input type="checkbox"/>                                                          | <input type="checkbox"/> |

## Scenario 11

Imagine you have an emergency healthcare need which requires calling an ambulance. Below are two hospitals, hospital A and hospital B, each with different characteristics. If you have a choice, which hospital would you choose from below?

|                                                                                                         | Hospital A                                                                        | Hospital B               |
|---------------------------------------------------------------------------------------------------------|-----------------------------------------------------------------------------------|--------------------------|
| <b>Travel time to hospital</b>                                                                          | Less than 30 minutes                                                              | 2 hours or more          |
| <b>Waiting time in the A&amp;E department to be seen by a doctor or nurse who can provide treatment</b> | 2 and half hours                                                                  | 1 hour                   |
| <b>Length of stay at the hospital before going home</b>                                                 | 6 days or more                                                                    | 1 day or less            |
| <b>Risk of dying from the illness</b>                                                                   | Low (1 in 100 patients)                                                           | High (7 in 100 patients) |
| <b>Risk of being re-admitted to the hospital after going home</b>                                       | Moderate (5 in 100 patients)                                                      | Mild (3 in 100 patients) |
| <b>Outpatient care after emergency treatment</b>                                                        | At a hospital which is about an extra 1 hour travel time from your local hospital | At your local hospital   |
| <b>Which hospital would you choose to go in an emergency? (Please tick one box)</b>                     | <input type="checkbox"/>                                                          | <input type="checkbox"/> |

## Scenario 12

Imagine you have an emergency healthcare need which requires calling an ambulance. Below are two hospitals, hospital A and hospital B, each with different characteristics. If you have a choice, which hospital would you choose from below?

|                                                                                                         | Hospital A                                                                        | Hospital B               |
|---------------------------------------------------------------------------------------------------------|-----------------------------------------------------------------------------------|--------------------------|
| <b>Travel time to hospital</b>                                                                          | 2 hours or more                                                                   | Less than 30 minutes     |
| <b>Waiting time in the A&amp;E department to be seen by a doctor or nurse who can provide treatment</b> | 4 hours or more                                                                   | Less than 30 minutes     |
| <b>Length of stay at the hospital before going home</b>                                                 | 6 days or more                                                                    | 1 day or less            |
| <b>Risk of dying from the illness</b>                                                                   | High (7 in 100 patients)                                                          | Low (1 in 100 patients)  |
| <b>Risk of being re-admitted to the hospital after going home</b>                                       | High (7 in 100 patients)                                                          | Low (1 in 100 patients)  |
| <b>Outpatient care after emergency treatment</b>                                                        | At a hospital which is about an extra 1 hour travel time from your local hospital | At your local hospital   |
| <b>Which hospital would you choose to go in an emergency? (Please tick one box)</b>                     | <input type="checkbox"/>                                                          | <input type="checkbox"/> |

## Scenario 13

Imagine you have an emergency healthcare need which requires calling an ambulance. Below are two hospitals, hospital A and hospital B, each with different characteristics. If you have a choice, which hospital would you choose from below?

|                                                                                                         | Hospital A               | Hospital B                                                                        |
|---------------------------------------------------------------------------------------------------------|--------------------------|-----------------------------------------------------------------------------------|
| <b>Travel time to hospital</b>                                                                          | 1 and half hours         | 1 hour                                                                            |
| <b>Waiting time in the A&amp;E department to be seen by a doctor or nurse who can provide treatment</b> | Less than 30 minutes     | 4 hours or more                                                                   |
| <b>Length of stay at the hospital before going home</b>                                                 | 5 days                   | 3 days                                                                            |
| <b>Risk of dying from the illness</b>                                                                   | Mild (3 in 100 patients) | Moderate (5 in 100 patients)                                                      |
| <b>Risk of being re-admitted to the hospital after going home</b>                                       | High (7 in 100 patients) | Low (1 in 100 patients)                                                           |
| <b>Outpatient care after emergency treatment</b>                                                        | At your local hospital   | At a hospital which is about an extra 1 hour travel time from your local hospital |
| <b>Which hospital would you choose to go in an emergency? (Please tick one box)</b>                     | <input type="checkbox"/> | <input type="checkbox"/>                                                          |



1  
2  
3 **Could you please indicate how easy or difficult it has been to complete the**  
4 **above choice sets** (Please tick only one of the boxes)  
5

6  
7 Very difficult

8  
9  
10 Difficult

11  
12  
13 Somewhat Difficult

14  
15  
16 Neutral

17  
18  
19 Somewhat Easy

20  
21  
22 Easy

23  
24  
25 Very Easy

26  
27  
28  
29  
30 **Finally, we would be grateful if you could provide the following information**  
31 **about you.** (Remain assured that no questions will identify who you are)  
32

33  
34  
35  
36  
37 **Are you a male or female?** (Please tick one of the boxes below)

38  
39  
40 Male

41  
42  
43 Female

44  
45  
46 Prefer not to say

1  
2  
3 **Which of the following age group do you belong to?** (Please tick one of the  
4 boxes below)  
5

6 16-29

7 30-34

8 35-39

9 40-44

10 45-49

11 50-54

12 55-59

13 60-64

14 65-69

15 70-75

16 75-79

17 80-84

18 85+

19  
20  
21  
22 **What is your post code?** (Please fill in below; we only need your partial post code,  
23 not the house/flat or street name, example NE30)  
24

25   
26  
27  
28  
29

30  
31 **What is the name of the GP surgery you are registered with?** (Please write in the  
32 space below. Please note we will not contact them. This is simply to help understand  
33 the results of the survey better).  
34  
35

36  
37  
38 .....

39  
40  
41  
42  
43 **In the last 12 months how many times have you visited the hospital with  
44 emergency healthcare need?**  
45

46 0

47 1

48 2

49 3

50 4 or more

1  
2  
3 **Under each heading, please tick the ONE box that best describes your current**  
4 **state of health.**  
5

6 **MOBILITY**

7  
8 I have no problems in walking about

9  
10 I have slight problems in walking about

11  
12 I have moderate problems in walking about

13  
14 I have severe problems in walking about

15  
16 I am unable to walk about

17  
18  
19  
20 **SELF-CARE**

21  
22 I have no problems washing or dressing myself

23  
24 I have slight problems washing or dressing myself

25  
26 I have moderate problems washing or dressing myself

27  
28 I have severe problems washing or dressing myself

29  
30 I am unable to wash or dress myself

31  
32  
33  
34 **USUAL ACTIVITIES** (e.g. work, study, housework, family or leisure activities)

35  
36 I have no problems doing my usual activities

37  
38 I have slight problems doing my usual activities

39  
40 I have moderate problems doing my usual activities

41  
42 I have severe problems doing my usual activities

43  
44 I am unable to do my usual activities

45  
46  
47  
48 **PAIN / DISCOMFORT**

49  
50 I have no pain or discomfort

51  
52 I have slight pain or discomfort

53  
54 I have moderate pain or discomfort

55  
56 I have severe pain or discomfort

57  
58 I have extreme pain or discomfort

**ANXIETY / DEPRESSION**

I am not anxious or depressed

I am slightly anxious or depressed

I am moderately anxious or depressed

I am severely anxious or depressed

I am extremely anxious or depressed

*UK (English) © 2009 EuroQol Group EQ-5D™ is a trade mark of the EuroQol Group*

1  
2  
3 **How would you rate the current state of your health?** (Please indicate by  
4 marking whichever point on the scale below indicates how good or bad your health  
5 state is today, imagining best state is marked 100 and the worst state is marked 0)  
6  
7  
8  
9

10  
11  
12  
13 Now please write the number you marked on the scale in the box  
14 below

15  
16 Your health today =

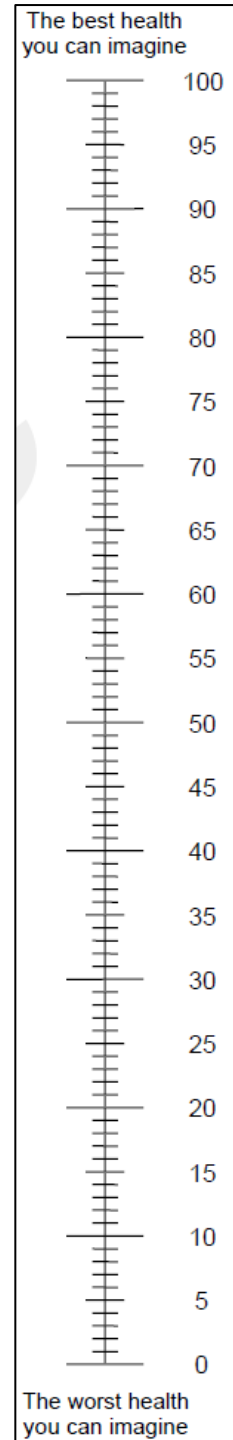

17  
18  
19  
20  
21  
22  
23  
24  
25  
26  
27  
28  
29  
30  
31  
32  
33  
34  
35  
36  
37  
38  
39  
40  
41  
42  
43  
44  
45  
46  
47  
48  
49  
50  
51  
52  
53  
54  
55  
56  
57  
58 *UK (English) © 2009 EuroQol Group EQ-5D™ is a trade mark of the EuroQol Group*

59 **Thank you for taking part in this survey.**

1  
2  
3  
4  
5  
6  
7  
8  
9  
10  
11  
12  
13  
14  
15  
16  
17  
18  
19  
20  
21  
22  
23  
24  
25  
26  
27  
28  
29  
30  
31  
32  
33  
34  
35  
36  
37  
38  
39  
40  
41  
42  
43  
44  
45  
46  
47  
48  
49  
50  
51  
52  
53  
54  
55  
56  
57  
58  
59  
60

# Survey on Hospital Preferences

(Block-2)

For peer review only

1  
2  
3 This survey is being carried out by a researcher in health economics at the Institute of  
4 Health & Society, Newcastle University. We would like to know what is important to  
5 you when thinking about hospitals which provide accident and emergency care. To do  
6 this we will ask you to **make a series of choices between two hospitals** which do  
7 not exist, but this will allow us to understand what people think is important when  
8 designing emergency services. We would like to know which hospital you personally  
9 would prefer to go to if you were suddenly unwell and had called 999, and whether  
10 your view would change if the hospitals performed differently e.g. reduced or increased  
11 waiting times or survival rates. We have not suggested a reason why you would be  
12 unwell, but it is not a painful condition. You would require treatment on the same day  
13 to feel better and this can only be given in hospital.  
14  
15  
16  
17  
18  
19  
20  
21  
22  
23  
24  
25  
26  
27  
28

29 The answers you provide here will only be used for research purposes and will not  
30 directly affect the healthcare that you need. There are no right or wrong choices, we  
31 are just interested in knowing your views. **You cannot be identified from your**  
32 **answers.** Please do not write anything which might give away your identity.  
33  
34  
35  
36  
37  
38

39 The hospitals **differ** in terms of the following ways:  
40  
41

- 42 7) **Travel time to the hospital:** This is the time it takes you to reach the hospital  
43 by ambulance.  
44  
45
- 46 8) **Waiting time in the A&E department to be seen by a doctor or nurse who**  
47 **can provide treatment:** This is the time you need to wait at the A&E to be given  
48 specific treatment for your problem by a doctor or nurse.  
49  
50  
51  
52
- 53 9) **Length of stay at the hospital before going home:** This is the number of  
54 days you need to stay in this hospital.  
55  
56  
57  
58  
59  
60

1  
2  
3 10) **Risk of dying from the illness:** This is a comparison of the average number  
4 of persons dying because of this illness after attending hospital.  
5  
6

7  
8 11) **Risk of being re-admitted to the hospital after going home:** This is the  
9 likelihood of being re-admitted to the hospital after you are discharged.  
10  
11

12 12) **Outpatient care after emergency treatment:** This is the hospital you need to  
13 go for outpatient care after discharge following your emergency treatment.  
14  
15  
16

17 **All other aspects of the two hospitals are the same.**  
18

19 Example of the task (*Please do not fill this one*)  
20  
21

22  
23  
24 Imagine you have an emergency healthcare need which requires calling an  
25 ambulance. Below are two hospitals, Hospital A and Hospital B, each with  
26 different characteristics. If you have a choice, which hospital would you choose  
27 from below?  
28  
29

|                                                                                                                            | Hospital A                                                                        | Hospital B                   |
|----------------------------------------------------------------------------------------------------------------------------|-----------------------------------------------------------------------------------|------------------------------|
| 30<br>31<br>32 <b>Travel time to hospital</b>                                                                              | 1 and half hours                                                                  | 1 hour                       |
| 33<br>34<br>35 <b>Waiting time in the A&amp;E department to be seen by a doctor or nurse who can provide treatment</b>     | 4 hours or more                                                                   | Less than 30 minutes         |
| 36<br>37<br>38 <b>Length of stay at the hospital before going home</b>                                                     | 3 days                                                                            | 5 days                       |
| 39<br>40<br>41 <b>Risk of dying from the illness</b>                                                                       | Moderate (5 in 100 patients)                                                      | Mild (3 in 100 patients)     |
| 42<br>43<br>44 <b>Risk of being re-admitted to the hospital after going home</b>                                           | Mild (3 in 100 patients)                                                          | Moderate (5 in 100 patients) |
| 45<br>46<br>47 <b>Outpatient care after emergency treatment</b>                                                            | At a hospital which is about an extra 1 hour travel time from your local hospital | At your local hospital       |
| 48<br>49<br>50<br>51<br>52<br>53<br>54 <b>Which hospital would you choose to go in an emergency? (Please tick one box)</b> | <input type="checkbox"/>                                                          | <input type="checkbox"/>     |



1  
2  
3 In this example,  
4

- 5 ➤ It takes 1 and half hours to reach hospital A and takes 1 hour to reach hospital  
6  
7 B.  
8  
9 ➤ You need to wait 4 hours or more in the A&E to be treated in hospital A, but  
10  
11 less than 30 minutes hospital B.  
12  
13 ➤ The length of stay in Hospital A is 3 days whereas it is 5 days in Hospital B.  
14  
15 ➤ Patient has moderate risks of death in Hospital A but has mild risks in Hospital  
16  
17 B.  
18  
19 ➤ The risk of being re-admitted is mild for Hospital A and is moderate for Hospital  
20  
21 B.  
22  
23 ➤ Outpatient care, after emergency treatment, at hospital B is provided at local  
24  
25 hospital and at hospital A is provided at a hospital which is about 1 hour travel  
26  
27 time away from the local hospital.  
28  
29  
30  
31

32 Here if hospital B is chosen, the box in the Hospital B column is marked with a  
33  
34 ✓ in the box. Or if hospital A is chosen, the box in the Hospital A column is  
35  
36 marked with ✓.  
37  
38

39  
40 **In addition, we will ask you few other questions about you, but remain assured**  
41  
42 **that no questions will identify who you are.**  
43  
44

45 It takes about 15 minutes to complete the survey. Your participation in this survey is  
46  
47 voluntary and you can stop at any time without providing any reason. If you do  
48  
49 complete the survey it is not possible to remove your answers later. We cannot identify  
50  
51 them, but nobody else will know your answers either. Should you have any queries  
52  
53 regarding the survey you can contact the researcher on this telephone 01912087821,  
54  
55 or email: [nawaraj.bhattarai@ncl.ac.uk](mailto:nawaraj.bhattarai@ncl.ac.uk) .  
56  
57  
58  
59  
60

If you agree to take part in this survey, then please choose which emergency hospital you would like to go to in the following situations. **Please note that in each of the situations the characteristics of hospitals change.**

For each situation please indicate which hospital you prefer by putting a tick (✓) in the appropriate box.

### Scenario 1

Imagine you have an emergency healthcare need which requires calling an ambulance. Below are two hospitals, hospital A and hospital B, each with different characteristics. If you have a choice, which hospital would you choose from below?

|                                                                                                         | Hospital A                   | Hospital B                                                                        |
|---------------------------------------------------------------------------------------------------------|------------------------------|-----------------------------------------------------------------------------------|
| <b>Travel time to hospital</b>                                                                          | 2 hours or more              | Less than 30 minutes                                                              |
| <b>Waiting time in the A&amp;E department to be seen by a doctor or nurse who can provide treatment</b> | Less than 30 minutes         | 4 hours or more                                                                   |
| <b>Length of stay at the hospital before going home</b>                                                 | 6 days or more               | 1 day or less                                                                     |
| <b>Risk of dying from the illness</b>                                                                   | Moderate (5 in 100 patients) | Low (1 in 100 patients)                                                           |
| <b>Risk of being re-admitted to the hospital after going home</b>                                       | Mild (3 in 100 patients)     | Moderate (5 in 100 patients)                                                      |
| <b>Outpatient care after emergency treatment</b>                                                        | At your local hospital       | At a hospital which is about an extra 1 hour travel time from your local hospital |
| <b>Which hospital would you choose to go in an emergency? (Please tick one box)</b>                     | <input type="checkbox"/>     | <input type="checkbox"/>                                                          |

## Scenario 2

Imagine you have an emergency healthcare need which requires calling an ambulance. Below are two hospitals, hospital A and hospital B, each with different characteristics. If you have a choice, which hospital would you choose from below?

|                                                                                                         | Hospital A                                                                        | Hospital B               |
|---------------------------------------------------------------------------------------------------------|-----------------------------------------------------------------------------------|--------------------------|
| <b>Travel time to hospital</b>                                                                          | Less than 30 minutes                                                              | 2 hours or more          |
| <b>Waiting time in the A&amp;E department to be seen by a doctor or nurse who can provide treatment</b> | 2 and half hours                                                                  | 1 hour                   |
| <b>Length of stay at the hospital before going home</b>                                                 | 6 days or more                                                                    | 1 day or less            |
| <b>Risk of dying from the illness</b>                                                                   | Low (1 in 100 patients)                                                           | High (7 in 100 patients) |
| <b>Risk of being re-admitted to the hospital after going home</b>                                       | High (7 in 100 patients)                                                          | Low (1 in 100 patients)  |
| <b>Outpatient care after emergency treatment</b>                                                        | At a hospital which is about an extra 1 hour travel time from your local hospital | At your local hospital   |
| <b>Which hospital would you choose to go in an emergency? (Please tick one box)</b>                     | <input type="checkbox"/>                                                          | <input type="checkbox"/> |

## Scenario 3

Imagine you have an emergency healthcare need which requires calling an ambulance. Below are two hospitals, hospital A and hospital B, each with different characteristics. If you have a choice, which hospital would you choose from below?

|                                                                                                         | Hospital A                                                                     | Hospital B               |
|---------------------------------------------------------------------------------------------------------|--------------------------------------------------------------------------------|--------------------------|
| <b>Travel time to hospital</b>                                                                          | Less than 30 minutes                                                           | 2 hours or more          |
| <b>Waiting time in the A&amp;E department to be seen by a doctor or nurse who can provide treatment</b> | Less than 30 minutes                                                           | 4 hours or more          |
| <b>Length of stay at the hospital before going home</b>                                                 | 1 day or less                                                                  | 6 days or more           |
| <b>Risk of dying from the illness</b>                                                                   | Low (1 in 100 patients)                                                        | High (7 in 100 patients) |
| <b>Risk of being re-admitted to the hospital after going home</b>                                       | High (7 in 100 patients)                                                       | Low (1 in 100 patients)  |
| <b>Outpatient care after emergency treatment</b>                                                        | At a hospital which about an extra 1 hour travel time from your local hospital | At your local hospital   |
| <b>Which hospital would you choose to go in an emergency? (Please tick one box)</b>                     | <input type="checkbox"/>                                                       | <input type="checkbox"/> |

## Scenario 4

Imagine you have an emergency healthcare need which requires calling an ambulance. Below are two hospitals, hospital A and hospital B, each with different characteristics. If you have a choice, which hospital would you choose from below?

|                                                                                                         | Hospital A               | Hospital B                                                                        |
|---------------------------------------------------------------------------------------------------------|--------------------------|-----------------------------------------------------------------------------------|
| <b>Travel time to hospital</b>                                                                          | Less than 30 minutes     | 2 hours or more                                                                   |
| <b>Waiting time in the A&amp;E department to be seen by a doctor or nurse who can provide treatment</b> | 2 and half hours         | Less than 30 minutes                                                              |
| <b>Length of stay at the hospital before going home</b>                                                 | 3 days                   | 5 days                                                                            |
| <b>Risk of dying from the illness</b>                                                                   | High (7 in 100 patients) | Low (1 in 100 patients)                                                           |
| <b>Risk of being re-admitted to the hospital after going home</b>                                       | Low (1 in 100 patients)  | High (7 in 100 patients)                                                          |
| <b>Outpatient care after emergency treatment</b>                                                        | At your local hospital   | At a hospital which is about an extra 1 hour travel time from your local hospital |
| <b>Which hospital would you choose to go in an emergency? (Please tick one box)</b>                     | <input type="checkbox"/> | <input type="checkbox"/>                                                          |

## Scenario 5

Imagine you have an emergency healthcare need which requires calling an ambulance. Below are two hospitals, hospital A and hospital B, each with different characteristics. If you have a choice, which hospital would you choose from below?

|                                                                                                         | Hospital A               | Hospital B                                                                        |
|---------------------------------------------------------------------------------------------------------|--------------------------|-----------------------------------------------------------------------------------|
| <b>Travel time to hospital</b>                                                                          | 1 hour                   | 1 and half hours                                                                  |
| <b>Waiting time in the A&amp;E department to be seen by a doctor or nurse who can provide treatment</b> | 1 hour                   | 2 and half hours                                                                  |
| <b>Length of stay at the hospital before going home</b>                                                 | 5 days                   | 3 days                                                                            |
| <b>Risk of dying from the illness</b>                                                                   | Mild (3 in 100 patients) | Moderate (5 in 100 patients)                                                      |
| <b>Risk of being re-admitted to the hospital after going home</b>                                       | Mild (3 in 100 patients) | Moderate (5 in 100 patients)                                                      |
| <b>Outpatient care after emergency treatment</b>                                                        | At your local hospital   | At a hospital which is about an extra 1 hour travel time from your local hospital |
| <b>Which hospital would you choose to go in an emergency? (Please tick one box)</b>                     | <input type="checkbox"/> | <input type="checkbox"/>                                                          |

## Scenario 6

Imagine you have an emergency healthcare need which requires calling an ambulance. Below are two hospitals, hospital A and hospital B, each with different characteristics. If you have a choice, which hospital would you choose from below?

|                                                                                                         | Hospital A               | Hospital B                   |
|---------------------------------------------------------------------------------------------------------|--------------------------|------------------------------|
| <b>Travel time to hospital</b>                                                                          | 2 hours or more          | 1 and half hours             |
| <b>Waiting time in the A&amp;E department to be seen by a doctor or nurse who can provide treatment</b> | 4 hours or more          | 1 hour                       |
| <b>Length of stay at the hospital before going home</b>                                                 | 6 days or more           | 3 days                       |
| <b>Risk of dying from the illness</b>                                                                   | Low (1 in 100 patients)  | Moderate (5 in 100 patients) |
| <b>Risk of being re-admitted to the hospital after going home</b>                                       | Low (1 in 100 patients)  | Low (1 in 100 patients)      |
| <b>Outpatient care after emergency treatment</b>                                                        | At your local hospital   | At your local hospital       |
| <b>Which hospital would you choose to go in an emergency? (Please tick one box)</b>                     | <input type="checkbox"/> | <input type="checkbox"/>     |

## Scenario 7

Imagine you have an emergency healthcare need which requires calling an ambulance. Below are two hospitals, hospital A and hospital B, each with different characteristics. If you have a choice, which hospital would you choose from below?

|                                                                                                         | Hospital A                   | Hospital B                                                                        |
|---------------------------------------------------------------------------------------------------------|------------------------------|-----------------------------------------------------------------------------------|
| <b>Travel time to hospital</b>                                                                          | 1 hour                       | 1 and half hours                                                                  |
| <b>Waiting time in the A&amp;E department to be seen by a doctor or nurse who can provide treatment</b> | 4 hours or more              | Less than 30 minutes                                                              |
| <b>Length of stay at the hospital before going home</b>                                                 | 3 days                       | 5 days                                                                            |
| <b>Risk of dying from the illness</b>                                                                   | Moderate (5 in 100 patients) | Mild (3 in 100 patients)                                                          |
| <b>Risk of being re-admitted to the hospital after going home</b>                                       | Moderate (5 in 100 patients) | Mild (3 in 100 patients)                                                          |
| <b>Outpatient care after emergency treatment</b>                                                        | At your local hospital       | At a hospital which is about an extra 1 hour travel time from your local hospital |
| <b>Which hospital would you choose to go in an emergency? (Please tick one box)</b>                     | <input type="checkbox"/>     | <input type="checkbox"/>                                                          |



## Scenario 8

Imagine you have an emergency healthcare need which requires calling an ambulance. Below are two hospitals, hospital A and hospital B, each with different characteristics. If you have a choice, which hospital would you choose from below?

|                                                                                                         | Hospital A                                                                        | Hospital B                   |
|---------------------------------------------------------------------------------------------------------|-----------------------------------------------------------------------------------|------------------------------|
| <b>Travel time to hospital</b>                                                                          | 2 hours or more                                                                   | Less than 30 minutes         |
| <b>Waiting time in the A&amp;E department to be seen by a doctor or nurse who can provide treatment</b> | Less than 30 minutes                                                              | 4 hours or more              |
| <b>Length of stay at the hospital before going home</b>                                                 | 1 day or less                                                                     | 6 days or more               |
| <b>Risk of dying from the illness</b>                                                                   | Mild (3 in 100 patients)                                                          | Moderate (5 in 100 patients) |
| <b>Risk of being re-admitted to the hospital after going home</b>                                       | High (7 in 100 patients)                                                          | Low (1 in 100 patients)      |
| <b>Outpatient care after emergency treatment</b>                                                        | At a hospital which is about an extra 1 hour travel time from your local hospital | At your local hospital       |
| <b>Which hospital would you choose to go in an emergency? (Please tick one box)</b>                     | <input type="checkbox"/>                                                          | <input type="checkbox"/>     |

## Scenario 9

Imagine you have an emergency healthcare need which requires calling an ambulance. Below are two hospitals, hospital A and hospital B, each with different characteristics. If you have a choice, which hospital would you choose from below?

|                                                                                                         | Hospital A                                                                        | Hospital B                   |
|---------------------------------------------------------------------------------------------------------|-----------------------------------------------------------------------------------|------------------------------|
| <b>Travel time to hospital</b>                                                                          | Less than 30 minutes                                                              | 1 and half hours             |
| <b>Waiting time in the A&amp;E department to be seen by a doctor or nurse who can provide treatment</b> | Less than 30 minutes                                                              | 1 hour                       |
| <b>Length of stay at the hospital before going home</b>                                                 | 1 day or less                                                                     | 3 days                       |
| <b>Risk of dying from the illness</b>                                                                   | High (7 in 100 patients)                                                          | Moderate (5 in 100 patients) |
| <b>Risk of being re-admitted to the hospital after going home</b>                                       | High (7 in 100 patients)                                                          | Low (1 in 100 patients)      |
| <b>Outpatient care after emergency treatment</b>                                                        | At a hospital which is about an extra 1 hour travel time from your local hospital | At your local hospital       |
| <b>Which hospital would you choose to go in an emergency? (Please tick one box)</b>                     | <input type="checkbox"/>                                                          | <input type="checkbox"/>     |

## Scenario 10

Imagine you have an emergency healthcare need which requires calling an ambulance. Below are two hospitals, hospital A and hospital B, each with different characteristics. If you have a choice, which hospital would you choose from below?

|                                                                                                         | Hospital A                                                                        | Hospital B               |
|---------------------------------------------------------------------------------------------------------|-----------------------------------------------------------------------------------|--------------------------|
| <b>Travel time to hospital</b>                                                                          | 1 and half hours                                                                  | 1 hour                   |
| <b>Waiting time in the A&amp;E department to be seen by a doctor or nurse who can provide treatment</b> | 4 hours or more                                                                   | Less than 30 minutes     |
| <b>Length of stay at the hospital before going home</b>                                                 | 6 days or more                                                                    | 1 day or less            |
| <b>Risk of dying from the illness</b>                                                                   | Low (1 in 100 patients)                                                           | High (7 in 100 patients) |
| <b>Risk of being re-admitted to the hospital after going home</b>                                       | Low (1 in 100 patients)                                                           | High (7 in 100 patients) |
| <b>Outpatient care after emergency treatment</b>                                                        | At a hospital which is about an extra 1 hour travel time from your local hospital | At your local hospital   |
| <b>Which hospital would you choose to go in an emergency? (Please tick one box)</b>                     | <input type="checkbox"/>                                                          | <input type="checkbox"/> |

## Scenario 11

Imagine you have an emergency healthcare need which requires calling an ambulance. Below are two hospitals, hospital A and hospital B, each with different characteristics. If you have a choice, which hospital would you choose from below?

|                                                                                                         | Hospital A                                                                        | Hospital B               |
|---------------------------------------------------------------------------------------------------------|-----------------------------------------------------------------------------------|--------------------------|
| <b>Travel time to hospital</b>                                                                          | 2 hours or more                                                                   | Less than 30 minutes     |
| <b>Waiting time in the A&amp;E department to be seen by a doctor or nurse who can provide treatment</b> | 4 hours or more                                                                   | Less than 30 minutes     |
| <b>Length of stay at the hospital before going home</b>                                                 | 1 day or less                                                                     | 6 days or more           |
| <b>Risk of dying from the illness</b>                                                                   | Low (1 in 100 patients)                                                           | High (7 in 100 patients) |
| <b>Risk of being re-admitted to the hospital after going home</b>                                       | Low (1 in 100 patients)                                                           | High (7 in 100 patients) |
| <b>Outpatient care after emergency treatment</b>                                                        | At a hospital which is about an extra 1 hour travel time from your local hospital | At your local hospital   |
| <b>Which hospital would you choose to go in an emergency? (Please tick one box)</b>                     | <input type="checkbox"/>                                                          | <input type="checkbox"/> |

## Scenario 12

Imagine you have an emergency healthcare need which requires calling an ambulance. Below are two hospitals, hospital A and hospital B, each with different characteristics. If you have a choice, which hospital would you choose from below?

|                                                                                                         | Hospital A                                                                        | Hospital B               |
|---------------------------------------------------------------------------------------------------------|-----------------------------------------------------------------------------------|--------------------------|
| <b>Travel time to hospital</b>                                                                          | 2 hours or more                                                                   | Less than 30 minutes     |
| <b>Waiting time in the A&amp;E department to be seen by a doctor or nurse who can provide treatment</b> | 4 hours or more                                                                   | Less than 30 minutes     |
| <b>Length of stay at the hospital before going home</b>                                                 | 6 days or more                                                                    | 1 day or less            |
| <b>Risk of dying from the illness</b>                                                                   | High (7 in 100 patients)                                                          | Low (1 in 100 patients)  |
| <b>Risk of being re-admitted to the hospital after going home</b>                                       | High (7 in 100 patients)                                                          | Low (1 in 100 patients)  |
| <b>Outpatient care after emergency treatment</b>                                                        | At a hospital which is about an extra 1 hour travel time from your local hospital | At your local hospital   |
| <b>Which hospital would you choose to go in an emergency? (Please tick one box)</b>                     | <input type="checkbox"/>                                                          | <input type="checkbox"/> |

## Scenario 13

Imagine you have an emergency healthcare need which requires calling an ambulance. Below are two hospitals, hospital A and hospital B, each with different characteristics. If you have a choice, which hospital would you choose from below?

|                                                                                                         | Hospital A                   | Hospital B                                                                        |
|---------------------------------------------------------------------------------------------------------|------------------------------|-----------------------------------------------------------------------------------|
| <b>Travel time to hospital</b>                                                                          | 1 and half hours             | 1 hour                                                                            |
| <b>Waiting time in the A&amp;E department to be seen by a doctor or nurse who can provide treatment</b> | 1 hour                       | 2 and half hours                                                                  |
| <b>Length of stay at the hospital before going home</b>                                                 | 5 days                       | 3 days                                                                            |
| <b>Risk of dying from the illness</b>                                                                   | High (7 in 100 patients)     | Low (1 in 100 patients)                                                           |
| <b>Risk of being re-admitted to the hospital after going home</b>                                       | Moderate (5 in 100 patients) | Mild (3 in 100 patients)                                                          |
| <b>Outpatient care after emergency treatment</b>                                                        | At your local hospital       | At a hospital which is about an extra 1 hour travel time from your local hospital |
| <b>Which hospital would you choose to go in an emergency? (Please tick one box)</b>                     | <input type="checkbox"/>     | <input type="checkbox"/>                                                          |

1  
2  
3 **Could you please indicate how easy or difficult it has been to complete the**  
4 **above choice sets** (Please tick only one of the boxes)  
5

6  
7 Very difficult

8  
9  
10 Difficult

11  
12  
13 Somewhat Difficult

14  
15  
16 Neutral

17  
18  
19 Somewhat Easy

20  
21  
22 Easy

23  
24  
25 Very Easy

26  
27  
28  
29  
30 **Finally, we would be grateful if you could provide the following information**  
31 **about you.** (Remain assured that no questions will identify who you are)  
32

33  
34  
35  
36  
37 **Are you a male or female?** (Please tick one of the boxes below)

38  
39  
40 Male

41  
42  
43 Female

44  
45  
46 Prefer not to say

1  
2  
3 **Which of the following age group do you belong to?** (Please tick one of the  
4 boxes below)  
5

6 16-29

7 30-34

8 35-39

9 40-44

10 45-49

11 50-54

12 55-59

13 60-64

14 65-69

15 70-75

16 75-79

17 80-84

18 85+

19  
20  
21  
22 **What is your post code?** (Please fill in below; we only need your partial post code,  
23 not the house/flat or street name, example NE30)  
24

25   
26  
27  
28  
29

30  
31 **What is the name of the GP surgery you are registered with?** (Please write in the  
32 space below. Please note we will not contact them. This is simply to help understand  
33 the results of the survey better).  
34  
35

36  
37  
38 .....

39  
40  
41  
42 **In the last 12 months how many times have you visited the hospital with  
43 emergency healthcare need?**  
44

45 0

46 1

47 2

48 3

49 4 or more



1  
2  
3 **Under each heading, please tick the ONE box that best describes your current**  
4 **state of health.**  
5

6 **MOBILITY**

7  
8 I have no problems in walking about

9  
10 I have slight problems in walking about

11  
12 I have moderate problems in walking about

13  
14 I have severe problems in walking about

15  
16 I am unable to walk about

17  
18  
19  
20 **SELF-CARE**

21  
22 I have no problems washing or dressing myself

23  
24 I have slight problems washing or dressing myself

25  
26 I have moderate problems washing or dressing myself

27  
28 I have severe problems washing or dressing myself

29  
30 I am unable to wash or dress myself

31  
32  
33  
34 **USUAL ACTIVITIES** (e.g. work, study, housework, family or leisure activities)

35  
36 I have no problems doing my usual activities

37  
38 I have slight problems doing my usual activities

39  
40 I have moderate problems doing my usual activities

41  
42 I have severe problems doing my usual activities

43  
44 I am unable to do my usual activities

45  
46  
47  
48 **PAIN / DISCOMFORT**

49  
50 I have no pain or discomfort

51  
52 I have slight pain or discomfort

53  
54 I have moderate pain or discomfort

55  
56 I have severe pain or discomfort

57  
58 I have extreme pain or discomfort

**ANXIETY / DEPRESSION**

I am not anxious or depressed

I am slightly anxious or depressed

I am moderately anxious or depressed

I am severely anxious or depressed

I am extremely anxious or depressed

*UK (English) © 2009 EuroQol Group EQ-5D™ is a trade mark of the EuroQol Group*

**How would you rate the current state of your health?** (Please indicate by marking whichever point on the scale below indicates how good or bad your health state is today, imagining best state is marked 100 and the worst state is marked 0)

Now please write the number you marked on the scale in the box below

Your health today =

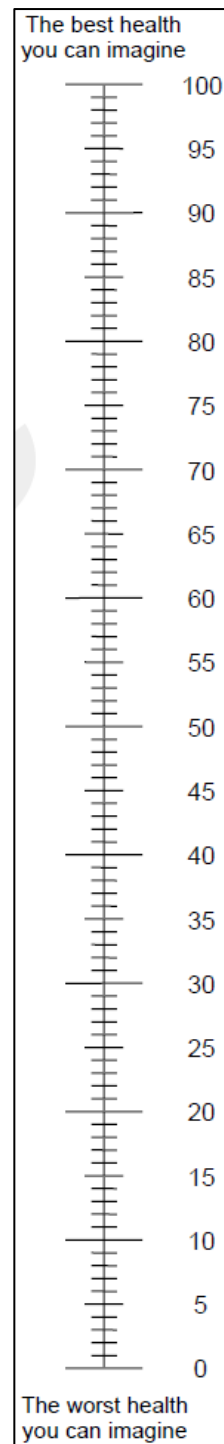

UK (English) © 2009 EuroQol Group EQ-5D™ is a trade mark of the EuroQol Group

**Thank you for taking part in this survey.**

1  
2  
3  
4  
5  
6  
7  
8  
9  
10  
11  
12  
13  
14  
15  
16  
17  
18  
19  
20  
21  
22  
23  
24  
25  
26  
27  
28  
29  
30  
31  
32  
33  
34  
35  
36  
37  
38  
39  
40  
41  
42  
43  
44  
45  
46  
47  
48  
49  
50  
51  
52  
53  
54  
55  
56  
57  
58  
59  
60

For peer review only
